# Supplementary material
Source: publisher site journal article supplement (https://www.spandidos-publications.com/8392/downloadSupplementary)
Supplement: Supplementary file 1 [file downloadSupplementary]

## Sheet: Table_S1
Table SI. Uncropped images of SDS-PAGE gels

## Sheet: Table_S2
Table SII. Sequences of primers used for quantitative PCR
Primer no.	Name of amplicon	Forward (5'→3')	Reverse (5'→3')	Length (bp)
1	LUZP1-RelA_E1(Peak1)	ACCATAGGGGAAGCCTGTGT	GCGTGAAGGAATTAGGGGCA	79
2	LUZP1-RelA_P1	CGTTCAGCGCAAAGGAGGAA	TGGCTTTCTCTCCGCGTTTC	128
3	LUZP1-RelA_P2	GGCCTACAGACAACCCCG	GACTGACAATGAGGGGCGG	86
4	LUZP1-RelA_E2	TGCATAACCTTGGAGGAGCC	CAAGCCACAACAAGCTCTGC	113
5	LUZP1-RelA_N1	GCGTTCCTATGAGAGAGGTAGG	TCTTTTAATTTTGTTCTGGTGTGCT	107
6	LUZP1-RelA_FaDu (Peak2)	GATTGACTGGGGATGGCAGT	CAGGCAGTGAGCTAGGCATC	130
7	LUZP1-RelA_E3 (Peak6)	GAGTCCTTGCCCCATAAGGT	CCCTCAATGTCCACACAAAAACA	146
8	LUZP1-RelA_E4 (Peak7)	CAAGAAAGGGCTTCCCAGCA	GGCAAGAGTGAACAGACAGC	137
9	LUZP1-RelA_E5 (Peak8)	CAGGCTTGGAGAGAATTGGC	CCTATGAGAAAGCTCAGGGCA	83
10	LUZP1-RelA_N2	CAAACCAGTCTTCATACCAACCT	CAACAGGCAGCTTCTACAAAACA	84

## Sheet: Table_S3
Table SIII. Information of shRNAs
RNA	Target gene	Target sequence	shRNA clone
shGFP (Control)	GFP	GCAAGCTGACCCTGAAGTTCAT	Addgene Plasmid #30323
shNF-κB p65 #1	RELA (NF-κB p65)	GCCTTAATAGTAGGGTAAGTT	TRCN0000014683
shNF-κB p65 #2	RELA (NF-κB p65)	CGGATTGAGGAGAAACGTAAA	TRCN0000014684
shLUZP1 #1	LUZP1	GCTGGAAATGCTCAGAGTCAA	TRCN0000140802
shLUZP1 #2	LUZP1	CGTGGAATCTACCAATAGCAA	TRCN0000142862

## Sheet: Table_S4
Table SIV. Proteomic alteration in tissue specimen of short-term survival compared to long-term survival
Gene name	Protein name	MW [kDa]	calc. pI	Abundance Ratio: short / long	Abundance Ratio Adj. P-Value: short / long
LUZP1	Leucine zipper protein 1	120.2	8.5	100	1.32548e-16
DDX3Y	ATP-dependent RNA helicase DDX3Y	73.1	7.55	100	1.32548e-16
TUBB1	Tubulin beta-1 chain	50.3	5.17	100	1.32548e-16
NQO1	NAD(P)H dehydrogenase [quinone] 1	30.8	8.88	100	1.32548e-16
EHD3	EH domain-containing protein 3	60.8	6.57	100	1.32548e-16
GPC4	Glypican-4	62.4	6.68	100	1.32548e-16
GSTM2	Glutathione S-transferase Mu 2	25.7	6.37	100	1.32548e-16
RAB6B	Ras-related protein Rab-6B	23.4	5.53	100	1.32548e-16
AGO1	Protein argonaute-1	97.2	9.16	100	1.32548e-16
ACOT1	Acyl-coenzyme A thioesterase 1	46.2	7.34	100	1.32548e-16
SMARCC1	SWI/SNF complex subunit SMARCC1	122.8	5.76	100	1.32548e-16
CKM	Creatine kinase M-type	43.1	7.25	100	1.32548e-16
MTDH	Protein LYRIC	63.8	9.32	100	1.32548e-16
OSGEP	Probable tRNA N6-adenosine threonylcarbamoyltransferase	36.4	6.35	100	1.32548e-16
IGHV3-13	Immunoglobulin heavy variable 3-13	12.5	7.08	100	1.32548e-16
IGKV1-27	Immunoglobulin kappa variable 1-27	12.7	8.29	100	1.32548e-16
FMR1	Synaptic functional regulator FMR1	71.1	7.42	100	1.32548e-16
PF4	Platelet factor 4	10.8	8.62	100	1.32548e-16
PARVB	Beta-parvin	41.7	6.73	100	1.32548e-16
COPS7A	COP9 signalosome complex subunit 7a	30.3	8.22	100	1.32548e-16
CZIB	CXXC motif containing zinc binding protein	18	5.01	100	1.32548e-16
IGKV3D-20	Immunoglobulin kappa variable 3D-20	12.5	4.59	100	1.32548e-16
TMPRSS11E	Transmembrane protease serine 11E	47.7	8.59	100	1.32548e-16
KEAP1	Kelch-like ECH-associated protein 1	69.6	6.44	100	1.32548e-16
MYH7B	Myosin-7B	225.7	6.09	100	1.32548e-16
FMNL3	Formin-like protein 3	117.1	6.65	100	1.32548e-16
MEST	Mesoderm-specific transcript homolog protein	38.8	9.74	100	1.32548e-16
SRGAP2	SLIT-ROBO Rho GTPase-activating protein 2	120.8	6.7	100	1.32548e-16
IFI27	Interferon alpha-inducible protein 27, mitochondrial	11.5	11.06	100	1.32548e-16
HSD17B8	(3R)-3-hydroxyacyl-CoA dehydrogenase	27	6.54	100	1.32548e-16
TAF15	TATA-binding protein-associated factor 2N	61.8	8.02	100	1.32548e-16
SHPK	Sedoheptulokinase	51.5	6.83	100	1.32548e-16
PTRH1	Probable peptidyl-tRNA hydrolase	22.9	10.56	100	1.32548e-16
BOP1	Ribosome biogenesis protein BOP1	83.6	6.19	100	1.32548e-16
FUNDC1	FUN14 domain-containing protein 1	17.2	8.62	100	1.32548e-16
CCNY	Cyclin-Y	39.3	7.2	100	1.32548e-16
P2RX4	P2X purinoceptor 4	43.3	7.99	100	1.32548e-16
SAFB2	Scaffold attachment factor B2	107.4	6.16	100	1.32548e-16
PPM1B	Protein phosphatase 1B	52.6	5.05	100	1.32548e-16
VKORC1	Vitamin K epoxide reductase complex subunit 1	18.2	9.36	100	1.32548e-16
SH3BGRL2	SH3 domain-binding glutamic acid-rich-like protein 2	12.3	6.71	100	1.32548e-16
ACADS	Short-chain specific acyl-CoA dehydrogenase, mitochondrial	44.3	7.99	100	1.32548e-16
DARS2	Aspartate--tRNA ligase, mitochondrial	73.5	8.02	100	1.32548e-16
DNAJC9	DnaJ homolog subfamily C member 9	29.9	5.73	100	1.32548e-16
ST14	Suppressor of tumorigenicity 14 protein	94.7	6.55	100	1.32548e-16
AUP1	Lipid droplet-regulating VLDL assembly factor AUP1	45.8	8.65	100	1.32548e-16
NID2	Nidogen-2	151.2	5.29	100	1.32548e-16
LAS1L	Ribosomal biogenesis protein LAS1L	83	4.73	100	1.32548e-16
EHBP1	EH domain-binding protein 1	139.9	5.35	100	1.32548e-16
RBM10	RNA-binding protein 10	103.5	5.97	100	1.32548e-16
TCP11L1	T-complex protein 11-like protein 1	57	5.59	100	1.32548e-16
TRMT6	tRNA (adenine(58)-N(1))-methyltransferase non-catalytic subunit TRM6	55.8	7.55	100	1.32548e-16
GP1BB	Platelet glycoprotein Ib beta chain	21.7	9.31	100	1.32548e-16
GSTA1	Glutathione S-transferase A1	25.6	8.88	100	1.32548e-16
SNX18	Sorting nexin-18	68.9	5.68	100	1.32548e-16
IGHV3-35	Probable non-functional immunoglobulin heavy variable 3-35	12.8	7.88	100	1.32548e-16
GTF2A1	Transcription initiation factor IIA subunit 1	41.5	4.55	100	1.32548e-16
PELO	Protein pelota homolog	43.3	6.34	100	1.32548e-16
PTGR2	Prostaglandin reductase 2	38.5	5.41	100	1.32548e-16
NUDT1	7,8-dihydro-8-oxoguanine triphosphatase	22.5	5.27	100	1.32548e-16
SF3B4	Splicing factor 3B subunit 4	44.4	8.56	100	1.32548e-16
MCM3AP	Germinal-center associated nuclear protein	218.3	6.39	100	1.32548e-16
THNSL1	Threonine synthase-like 1	83	7.12	100	1.32548e-16
AHCTF1	Protein ELYS	252.3	6.6	100	1.32548e-16
PIP4K2B	Phosphatidylinositol 5-phosphate 4-kinase type-2 beta	47.3	7.33	100	1.32548e-16
P3H4	Endoplasmic reticulum protein SC65	50.3	4.77	100	1.32548e-16
EDIL3	EGF-like repeat and discoidin I-like domain-containing protein 3	53.7	7.28	100	1.32548e-16
NUP58	Nucleoporin p58/p45	60.9	9.33	100	1.32548e-16
PTP4A2	Protein tyrosine phosphatase type IVA 2	19.1	8.37	100	1.32548e-16
MYO9B	Unconventional myosin-IXb	243.2	8.75	100	1.32548e-16
OSGEPL1	Probable tRNA N6-adenosine threonylcarbamoyltransferase, mitochondrial	45.1	8.56	100	1.32548e-16
VAV1	Proto-oncogene vav	98.3	6.62	100	1.32548e-16
HDAC3	Histone deacetylase 3	48.8	5.16	100	1.32548e-16
SURF1	Surfeit locus protein 1	33.3	9.6	100	1.32548e-16
DEFB103A	Beta-defensin 103	7.7	10.11	100	1.32548e-16
GATAD2B	Transcriptional repressor p66-beta	65.2	9.7	100	1.32548e-16
ADD2	Beta-adducin	80.8	5.92	100	1.32548e-16
RGS12	Regulator of G-protein signaling 12	156.3	7.44	100	1.32548e-16
PPP1R10	Serine/threonine-protein phosphatase 1 regulatory subunit 10	99	9.17	100	1.32548e-16
NEDD4L	E3 ubiquitin-protein ligase NEDD4-like	111.9	5.82	100	1.32548e-16
DPCD	Protein DPCD	23.2	9.03	100	1.32548e-16
MPIG6B	Megakaryocyte and platelet inhibitory receptor G6b	26.1	9.61	100	1.32548e-16
MAP7	Ensconsin	84	9.61	100	1.32548e-16
TMEM263	Transmembrane protein 263	11.7	9.32	100	1.32548e-16
EPHB4	Ephrin type-B receptor 4	108.2	6.9	100	1.32548e-16
ATP13A3	Polyamine-transporting ATPase 13A3	138	6.64	100	1.32548e-16
TCOF1	Treacle protein	152	9.04	100	1.32548e-16
TSPAN14	Tetraspanin-14	30.7	6.84	100	1.32548e-16
MICAL3	[F-actin]-monooxygenase MICAL3	224.2	5.55	100	1.32548e-16
DDR1	Epithelial discoidin domain-containing receptor 1	101.1	6.83	100	1.32548e-16
ACVR1	Activin receptor type-1	57.1	7.33	100	1.32548e-16
POLR1B	DNA-directed RNA polymerase I subunit RPA2	128.1	7.83	100	1.32548e-16
CDKAL1	Threonylcarbamoyladenosine tRNA methylthiotransferase	65.1	7.46	100	1.32548e-16
TMPRSS11B	Transmembrane protease serine 11B	46.3	8.85	100	1.32548e-16
MUC7	Mucin-7	39.1	8.78	100	1.32548e-16
HSDL1	Inactive hydroxysteroid dehydrogenase-like protein 1	37	8.72	100	1.32548e-16
KLHL41	Kelch-like protein 41	68	5.29	100	1.32548e-16
CDC123	Cell division cycle protein 123 homolog	39.1	4.81	100	1.32548e-16
MMAA	Methylmalonic aciduria type A protein, mitochondrial	46.5	9.29	100	1.32548e-16
FAM169A	Soluble lamin-associated protein of 75 kDa	74.9	4.6	100	1.32548e-16
STARD7	StAR-related lipid transfer protein 7, mitochondrial	43.1	8.95	100	1.32548e-16
ABCD1	ATP-binding cassette sub-family D member 1	82.9	8.95	100	1.32548e-16
PISD	Phosphatidylserine decarboxylase proenzyme, mitochondrial	46.6	9.42	100	1.32548e-16
SIRT5	NAD-dependent protein deacylase sirtuin-5, mitochondrial	33.9	8.47	100	1.32548e-16
LSM12	Protein LSM12 homolog	21.7	7.74	100	1.32548e-16
KLHL22	Kelch-like protein 22	71.6	5.49	100	1.32548e-16
DNAH8	Dynein axonemal heavy chain 8	514.3	6.32	100	1.32548e-16
TRIOBP	TRIO and F-actin-binding protein	261.2	8.48	100	1.32548e-16
DAAM1	Disheveled-associated activator of morphogenesis 1	123.4	7.23	100	1.32548e-16
GATM	Glycine amidinotransferase, mitochondrial	48.4	8.05	100	1.32548e-16
ALDH3A1	Aldehyde dehydrogenase, dimeric NADP-preferring	50.4	6.54	96.881	1.32548e-16
UGT1A9	UDP-glucuronosyltransferase 1A9	59.9	7.9	56.363	1.32548e-16
IGHV5-51	Immunoglobulin heavy variable 5-51	12.7	8.27	48.98	9.67273e-13
GSTM1	Glutathione S-transferase Mu 1	25.7	6.7	41.76	1.32548e-16
GPX2	Glutathione peroxidase 2	21.9	7.78	31.421	3.817e-14
GSTM4	Glutathione S-transferase Mu 4	25.5	5.9	31.048	8.84618e-13
CA9	Carbonic anhydrase 9	49.7	4.72	26.338	4.29809e-09
SPRR3	Small proline-rich protein 3	18.1	8.57	18.413	5.68175e-09
IFI44L	Interferon-induced protein 44-like	51.3	6.79	17.86	6.34992e-08
GP1BA	Platelet glycoprotein Ib alpha chain	71.5	6.29	17.315	1.02239e-08
MB	Myoglobin	17.2	7.68	16.412	6.65806e-08
ITGA2B	Integrin alpha-IIb	113.3	5.38	11.574	2.29972e-08
CLDN4	Claudin-4	22.1	8.05	11.255	4.08733e-05
MACROD1	ADP-ribose glycohydrolase MACROD1	35.5	9.51	10.354	5.89025e-06
TGM3	Protein-glutamine gamma-glutamyltransferase E	76.6	5.86	10.058	1.68419e-07
ADH7	All-trans-retinol dehydrogenase [NAD(+)] ADH7	41.5	7.85	9.682	1.94071e-07
GSTM3	Glutathione S-transferase Mu 3	26.5	5.54	9.325	4.69173e-07
ITGB3	Integrin beta-3	87	5.24	8.741	1.59183e-05
CAVIN2	Caveolae-associated protein 2	47.1	5.21	8.567	0.000108394
MCMBP	Mini-chromosome maintenance complex-binding protein	72.9	5.87	8.3	0.0016982
DYNLT1	Dynein light chain Tctex-type 1	12.4	5.08	8.072	8.17066e-05
PPBP	Platelet basic protein	13.9	8.79	7.406	0.000152354
IGHV4-30-2	Immunoglobulin heavy variable 4-30-2	13	9.67	7.238	4.21812e-05
GSTA4	Glutathione S-transferase A4	25.7	8.27	7.181	0.000285687
SLC4A1AP	Kanadaptin	88.8	5.19	7.132	0.00187615
DPY30	Protein dpy-30 homolog	11.2	4.88	6.875	0.00596477
ADIPOQ	Adiponectin	26.4	5.74	6.722	0.000388331
SDC2	Syndecan-2	22.1	4.86	6.535	0.00615768
MYH14	Myosin-14	227.7	5.6	6.346	5.383e-05
OAS1	2'-5'-oligoadenylate synthase 1	46	8.22	6.245	0.000510264
HERC6	Probable E3 ubiquitin-protein ligase HERC6	115.1	7.96	5.879	0.00580586
SLCO3A1	Solute carrier organic anion transporter family member 3A1	76.5	6.73	5.706	0.0124423
GSDMD	Gasdermin-D	52.8	5.08	5.674	0.00179043
CYB5A	Cytochrome b5	15.3	4.96	5.452	0.00168403
SYNJ2BP	Synaptojanin-2-binding protein	15.9	6.3	5.45	0.00975504
CFHR1	Complement factor H-related protein 1	37.6	7.39	5.331	0.00129999
SLC26A2	Sulfate transporter	81.6	8.38	5.266	0.00895419
PPM1G	Protein phosphatase 1G	59.2	4.36	5.25	0.000496264
GP9	Platelet glycoprotein IX	19	6.34	5.243	0.0151924
IFI44	Interferon-induced protein 44	50.5	6.89	5.229	0.0193345
IGHG3	Immunoglobulin heavy constant gamma 3	41.3	7.9	5.157	0.000478988
C9	Complement component C9	63.1	5.59	5.117	0.00141487
FLNC	Filamin-C	290.8	5.97	5.091	0.00258498
ISYNA1	Inositol-3-phosphate synthase 1	61	5.76	5.028	0.0268878
L1RE1	LINE-1 retrotransposable element ORF1 protein	40	9.51	5.019	0.0102621
EPB41L2	Band 4.1-like protein 2	112.5	5.44	4.987	0.0166962
NLRP2	NACHT, LRR and PYD domains-containing protein 2	120.4	6.07	4.971	0.0147073
SLC37A4	Glucose-6-phosphate exchanger SLC37A4	46.3	8.62	4.964	0.016223
FARP1	FERM, ARHGEF and pleckstrin domain-containing protein 1	118.6	8.15	4.921	0.0359867
TIMM21	Mitochondrial import inner membrane translocase subunit Tim21	28.2	9.7	4.905	0.0165829
PFKP	ATP-dependent 6-phosphofructokinase, platelet type	85.5	7.55	4.872	0.000834294
EECP	Zymogen granule protein 16 homolog B	22.7	7.39	4.86	0.000854494
PLG	Plasminogen	90.5	7.24	4.807	0.00124574
PC	Pyruvate carboxylase, mitochondrial	129.6	6.84	4.785	0.000987721
WBP2	WW domain-binding protein 2	28.1	5.91	4.774	0.00700849
CRYAB	Alpha-crystallin B chain	20.1	7.33	4.741	0.0030515
ITIH3	Inter-alpha-trypsin inhibitor heavy chain H3	99.8	5.74	4.692	0.00459282
SLC7A8	Large neutral amino acids transporter small subunit 2	58.3	5.94	4.462	0.00596477
PHGDH	D-3-phosphoglycerate dehydrogenase	56.6	6.71	4.45	0.00357102
DDX24	ATP-dependent RNA helicase DDX24	96.3	9.06	4.431	0.00716059
PDK1	[Pyruvate dehydrogenase (acetyl-transferring)] kinase isozyme 1, mitochondrial	49.2	8.81	4.303	0.0543173
IGKV2D-24	Probable non-functional immunoglobulin kappa variable 2D-24	13.1	8.87	4.298	0.00334794
NOL9	Polynucleotide 5'-hydroxyl-kinase NOL9	79.3	9.13	4.292	0.0604022
TMPO	Lamina-associated polypeptide 2, isoforms beta/gamma	50.6	9.38	4.288	0.0067412
L3HYPDH	Trans-3-hydroxy-L-proline dehydratase	38.1	6.68	4.287	0.0398229
CPB2	Carboxypeptidase B2	48.4	7.71	4.273	0.0391422
PCK2	Phosphoenolpyruvate carboxykinase [GTP], mitochondrial	70.7	7.62	4.27	0.0142927
F5	Coagulation factor V	251.5	6.05	4.223	0.0310936
RCL1	RNA 3'-terminal phosphate cyclase-like protein	40.8	9.26	4.174	0.0504741
NFIB	Nuclear factor 1 B-type	47.4	8.87	4.16	0.0146262
MAP1A	Microtubule-associated protein 1A	305.3	4.92	4.144	0.0172688
ENPP1	Ectonucleotide pyrophosphatase/phosphodiesterase family member 1	104.9	7.14	4.131	0.122187
ABI1	Abl interactor 1	55	7.06	4.072	0.0695996
DHX40	Probable ATP-dependent RNA helicase DHX40	88.5	8.65	4.066	0.136414
PRKRA	Interferon-inducible double-stranded RNA-dependent protein kinase activator A	34.4	8.41	4.051	0.00801766
SORD	Sorbitol dehydrogenase	38.3	7.97	4.042	0.00447638
BCAM	Basal cell adhesion molecule	67.4	5.81	3.997	0.00493469
ECI2	Enoyl-CoA delta isomerase 2	43.6	9	3.977	0.0460359
DHODH	Dihydroorotate dehydrogenase (quinone), mitochondrial	42.8	9.67	3.96	0.0426043
YLPM1	YLP motif-containing protein 1	241.5	6.55	3.96	0.050048
SERPINB3	Serpin B3	44.5	6.81	3.926	0.00577129
DNM1	Dynamin-1	97.3	7.17	3.875	0.0740813
EPB41L4B	Band 4.1-like protein 4B	99.7	9.04	3.835	0.0907731
TSN	Translin	26.2	6.44	3.831	0.0069723
ALDH3A2	Aldehyde dehydrogenase family 3 member A2	54.8	7.88	3.759	0.00627198
RPIA	Ribose-5-phosphate isomerase	33.2	8.54	3.755	0.123401
BST2	Bone marrow stromal antigen 2	19.8	5.6	3.741	0.00840526
IGHV3-64D	Immunoglobulin heavy variable 3-64D	12.8	7.85	3.682	0.0535043
CRP	C-reactive protein	25	5.63	3.643	0.0268778
LBP	Lipopolysaccharide-binding protein	53.4	6.7	3.637	0.0282902
DTD2	D-aminoacyl-tRNA deacylase 2	18.6	7.84	3.613	0.0759475
PLPP2	Phospholipid phosphatase 2	32.6	8.35	3.603	0.0703476
BAZ1B	Tyrosine-protein kinase BAZ1B	170.8	8.48	3.592	0.133643
TST	Thiosulfate sulfurtransferase	33.4	7.25	3.575	0.0186554
IGHA1	Immunoglobulin heavy constant alpha 1	37.6	6.51	3.551	0.0126763
OPLAH	5-oxoprolinase	137.4	6.58	3.531	0.0984408
EFR3A	Protein EFR3 homolog A	92.9	6.7	3.513	0.056297
COG7	Conserved oligomeric Golgi complex subunit 7	86.3	5.47	3.458	0.107865
ABCC1	Multidrug resistance-associated protein 1	171.5	7.11	3.451	0.0379146
IGHM	Immunoglobulin heavy constant mu	49.4	6.77	3.445	0.0158825
IGFALS	Insulin-like growth factor-binding protein complex acid labile subunit	66	6.79	3.437	0.106043
CERS6	Ceramide synthase 6	44.9	7.65	3.417	0.110885
IGLV4-69	Immunoglobulin lambda variable 4-69	12.8	6.51	3.414	0.108195
STAT1	Signal transducer and activator of transcription 1-alpha/beta	87.3	6.05	3.414	0.0169752
KDSR	3-ketodihydrosphingosine reductase	36.2	7.12	3.406	0.111622
YTHDC2	3'-5' RNA helicase YTHDC2	160.1	8.4	3.381	0.0648632
IGHV4-28	Immunoglobulin heavy variable 4-28	13.1	9.29	3.375	0.112014
HDHD5	Haloacid dehalogenase-like hydrolase domain-containing 5	46.3	8.13	3.366	0.0187358
PGGT1B	Geranylgeranyl transferase type-1 subunit beta	42.3	6.83	3.365	0.110085
ADD3	Gamma-adducin	79.1	6.32	3.358	0.0713972
DGLUCY	D-glutamate cyclase, mitochondrial	66.4	6.79	3.347	0.1618
RNF20	E3 ubiquitin-protein ligase BRE1A	113.6	5.94	3.338	0.122253
FGA	Fibrinogen alpha chain	94.9	6.01	3.332	0.02019
KDM1A	Lysine-specific histone demethylase 1A	92.8	6.52	3.317	0.137769
AMBP	Protein AMBP	39	6.25	3.274	0.0243359
ZC3H15	Zinc finger CCCH domain-containing protein 15	48.6	5.31	3.255	0.0535043
IGKV3-15	Immunoglobulin kappa variable 3-15	12.5	5.19	3.245	0.0245214
BTN3A1	Butyrophilin subfamily 3 member A1	57.6	8.03	3.241	0.190713
RBM15	RNA-binding protein 15	107.1	10.08	3.232	0.144253
GIMAP4	GTPase IMAP family member 4	37.5	7.81	3.22	0.136253
IGHV5-10-1	Immunoglobulin heavy variable 5-10-1	12.8	8.28	3.218	0.0887448
IGHV3-43D	Immunoglobulin heavy variable 3-43D	13	5.41	3.215	0.04824
POR	NADPH--cytochrome P450 reductase	76.6	5.58	3.201	0.0269184
SVIL	Supervillin	247.6	6.98	3.195	0.0765009
PYGB	Glycogen phosphorylase, brain form	96.6	6.86	3.195	0.0272279
URB1	Nucleolar pre-ribosomal-associated protein 1	254.2	6.47	3.167	0.275916
MATR3	Matrin-3	94.6	6.25	3.123	0.0532693
SMG8	Protein SMG8	109.6	7.68	3.115	0.147557
TNC	Tenascin	240.7	4.89	3.106	0.0332792
IGKV1-5	Immunoglobulin kappa variable 1-5	12.8	8.28	3.102	0.0533883
PCYT1A	Choline-phosphate cytidylyltransferase A	41.7	7.25	3.076	0.053451
IRF2BPL	Probable E3 ubiquitin-protein ligase IRF2BPL	82.6	8.24	3.051	0.155914
LRRC8E	Volume-regulated anion channel subunit LRRC8E	90.2	6.96	3.048	0.0821772
NF1	Neurofibromin	319.2	7.39	3.047	0.177176
F9	Coagulation factor IX	51.7	5.47	3.046	0.0866587
CLASP1	CLIP-associating protein 1	169.3	9.03	3.043	0.0428742
NUDT19	Nucleoside diphosphate-linked moiety X motif 19	42.2	7.64	3.024	0.070576
MLKL	Mixed lineage kinase domain-like protein	54.4	8.82	3.018	0.207274
RPA3	Replication protein A 14 kDa subunit	13.6	5.08	3.02	0.04761
DCXR	L-xylulose reductase	25.9	8.1	3.007	0.06401
MTA1	Metastasis-associated protein MTA1	80.7	9.26	3.006	0.190864
FECH	Ferrochelatase, mitochondrial	47.8	8.73	3.005	0.189642
MOGS	Mannosyl-oligosaccharide glucosidase	91.9	8.9	2.984	0.035866
AKT1	RAC-alpha serine/threonine-protein kinase	55.7	6.07	2.983	0.122253
SOSTDC1	Sclerostin domain-containing protein 1	23.3	9.74	2.967	0.236028
JMJD7	Bifunctional peptidase and (3S)-lysyl hydroxylase JMJD7	35.9	5.38	2.961	0.177977
CD5L	CD5 antigen-like	38.1	5.47	2.961	0.0983712
FERMT2	Fermitin family homolog 2	77.8	6.7	2.944	0.225278
SFXN1	Sideroflexin-1	35.6	9.07	2.935	0.0374468
SERPINA3	Alpha-1-antichymotrypsin	47.6	5.52	2.926	0.0498132
TPRKB	EKC/KEOPS complex subunit TPRKB	19.6	6.79	2.894	0.111842
PARN	Poly(A)-specific ribonuclease PARN	73.4	6.2	2.888	0.262061
CA3	Carbonic anhydrase 3	29.5	7.34	2.88	0.193045
KTN1	Kinectin	156.2	5.64	2.87	0.0508656
CYFIP2	Cytoplasmic FMR1-interacting protein 2	148.3	7.31	2.868	0.270876
NT5DC2	5'-nucleotidase domain-containing protein 2	60.7	6.77	2.856	0.198238
MCC	Colorectal mutant cancer protein	93	5.52	2.847	0.247848
AKAP2	A-kinase anchor protein 2	94.6	5.11	2.833	0.210067
APOL1	Apolipoprotein L1	43.9	5.81	2.831	0.102943
IGHV3-30	Immunoglobulin heavy variable 3-30	12.9	8.92	2.828	0.0607239
MXRA5	Matrix-remodeling-associated protein 5	312	8.32	2.823	0.301195
SPTBN2	Spectrin beta chain, non-erythrocytic 2	271.2	6.11	2.822	0.240681
CEACAM1	Carcinoembryonic antigen-related cell adhesion molecule 1	57.5	5.97	2.82	0.231995
GUCY1B1	Guanylate cyclase soluble subunit beta-1	70.5	5.35	2.808	0.306687
MTA3	Metastasis-associated protein MTA3	67.5	8.57	2.804	0.305247
MOV10	Helicase MOV-10	113.6	8.82	2.797	0.137533
SPTLC2	Serine palmitoyltransferase 2	62.9	7.78	2.787	0.266763
HNRNPH3	Heterogeneous nuclear ribonucleoprotein H3	36.9	6.87	2.775	0.11362
DHRS4	Dehydrogenase/reductase SDR family member 4	29.5	8.56	2.769	0.163388
MX2	Interferon-induced GTP-binding protein Mx2	82	8.76	2.763	0.163054
RHBDD2	Rhomboid domain-containing protein 2	39.2	9.32	2.76	0.1618
FHL1	Four and a half LIM domains protein 1	36.2	8.97	2.76	0.0866406
GCLC	Glutamate--cysteine ligase catalytic subunit	72.7	6.09	2.751	0.110734
SF3A2	Splicing factor 3A subunit 2	49.2	9.64	2.75	0.158599
TREX1	Three-prime repair exonuclease 1	33.2	7.93	2.745	0.290053
C4BPA	C4b-binding protein alpha chain	67	7.3	2.735	0.0613173
NLRX1	NLR family member X1	107.5	7.37	2.709	0.119511
HAX1	HCLS1-associated protein X-1	31.6	4.92	2.708	0.291535
HDHD3	Haloacid dehalogenase-like hydrolase domain-containing protein 3	28	6.71	2.703	0.116135
LHPP	Phospholysine phosphohistidine inorganic pyrophosphate phosphatase	29.1	6.15	2.699	0.178187
IFITM2	Interferon-induced transmembrane protein 2	14.6	7.42	2.696	0.0812864
OASL	2'-5'-oligoadenylate synthase-like protein	59.2	7.87	2.688	0.227778
IFI35	Interferon-induced 35 kDa protein	31.5	6.09	2.679	0.0846355
F12	Coagulation factor XII	67.7	7.74	2.671	0.186397
SLC1A4	Neutral amino acid transporter A	55.7	6.25	2.671	0.15989
NCKAP1	Nck-associated protein 1	128.7	6.62	2.671	0.145943
SERBP1	Plasminogen activator inhibitor 1 RNA-binding protein	44.9	8.65	2.669	0.182219
C7	Complement component C7	93.5	6.48	2.663	0.163332
STRN3	Striatin-3	87.2	5.36	2.661	0.181104
HERC5	E3 ISG15--protein ligase HERC5	116.8	7.65	2.656	0.370454
GSR	Glutathione reductase, mitochondrial	56.2	8.5	2.65	0.104208
C1QA	Complement C1q subcomponent subunit A	26	9.11	2.648	0.173635
IGHV3-15	Immunoglobulin heavy variable 3-15	12.9	8.62	2.637	0.0887541
MPDU1	Mannose-P-dolichol utilization defect 1 protein	26.6	8.94	2.633	0.12303
ADAR	Double-stranded RNA-specific adenosine deaminase	136	8.65	2.629	0.115316
DBN1	Drebrin	71.4	4.45	2.626	0.210188
RNF123	E3 ubiquitin-protein ligase RNF123	148.4	6.74	2.605	0.307539
HIBCH	3-hydroxyisobutyryl-CoA hydrolase, mitochondrial	43.5	8.19	2.6	0.167682
ITIH4	Inter-alpha-trypsin inhibitor heavy chain H4	103.3	6.98	2.6	0.102898
SIPA1	Signal-induced proliferation-associated protein 1	112.1	6.6	2.587	0.103076
RALB	Ras-related protein Ral-B	23.4	6.62	2.581	0.100177
DSG2	Desmoglein-2	122.2	5.24	2.579	0.289674
SLC4A1	Band 3 anion transport protein	101.7	5.19	2.579	0.104879
HLA-E	HLA class I histocompatibility antigen, alpha chain E	40	5.83	2.575	0.181104
ITGA2	Integrin alpha-2	129.2	5.31	2.567	0.107865
GNB4	Guanine nucleotide-binding protein subunit beta-4	37.5	6	2.559	0.20869
FLT1	Vascular endothelial growth factor receptor 1	150.7	8.38	2.558	0.300334
PLEKHG3	Pleckstrin homology domain-containing family G member 3	134.3	6.55	2.556	0.315982
CASK	Peripheral plasma membrane protein CASK	105.1	6.43	2.552	0.192338
SUCLG2	Succinate--CoA ligase [GDP-forming] subunit beta, mitochondrial	46.5	6.39	2.546	0.211818
CLU	Clusterin	52.5	6.27	2.537	0.170646
IGHV3-72	Immunoglobulin heavy variable 3-72	13.2	7.85	2.527	0.19275
PCOLCE	Procollagen C-endopeptidase enhancer 1	47.9	7.43	2.513	0.336765
APOL2	Apolipoprotein L2	37.1	6.74	2.508	0.136412
KLK10	Kallikrein-10	30.2	8.59	2.504	0.110924
MYG1	MYG1 exonuclease	42.5	6.77	2.502	0.254097
SELENBP1	Methanethiol oxidase	52.4	6.37	2.502	0.122253
TMEM132A	Transmembrane protein 132A	110	5.62	2.494	0.324901
NLN	Neurolysin, mitochondrial	80.6	6.64	2.487	0.306687
DBI	Acyl-CoA-binding protein	10	6.57	2.486	0.190713
DPP4	Dipeptidyl peptidase 4	88.2	6.04	2.484	0.359468
HAT1	Histone acetyltransferase type B catalytic subunit	49.5	5.69	2.478	0.247848
CP	Ceruloplasmin	122.1	5.72	2.475	0.12999
NUDT3	Diphosphoinositol polyphosphate phosphohydrolase 1	19.5	6.34	2.474	0.249527
TMEM70	Transmembrane protein 70, mitochondrial	29	8.91	2.473	0.19275
OPTN	Optineurin	65.9	5.17	2.471	0.370454
XPO5	Exportin-5	136.2	5.8	2.451	0.136412
EPCAM	Epithelial cell adhesion molecule	34.9	7.46	2.449	0.39598
HSPE1	10 kDa heat shock protein, mitochondrial	10.9	8.92	2.448	0.137187
ITIH2	Inter-alpha-trypsin inhibitor heavy chain H2	106.4	6.86	2.443	0.138403
RAB29	Ras-related protein Rab-7L1	23.1	7.18	2.434	0.327203
PLEK	Pleckstrin	40.1	8.28	2.431	0.247573
COL1A1	Collagen alpha-1(I) chain	138.9	5.8	2.428	0.14345
MCCC1	Methylcrotonoyl-CoA carboxylase subunit alpha, mitochondrial	80.4	7.78	2.412	0.3396
MINPP1	Multiple inositol polyphosphate phosphatase 1	55	7.81	2.409	0.354534
ERH	Enhancer of rudimentary homolog	12.3	5.92	2.407	0.302873
ADD1	Alpha-adducin	80.9	5.83	2.407	0.231592
PACS1	Phosphofurin acidic cluster sorting protein 1	104.8	7.74	2.401	0.399259
HSPD1	60 kDa heat shock protein, mitochondrial	61	5.87	2.39	0.156022
VWF	von Willebrand factor	309.1	5.48	2.386	0.418134
FDFT1	Squalene synthase	48.1	6.54	2.385	0.408815
TRA2A	Transformer-2 protein homolog alpha	32.7	11.27	2.385	0.275226
IGSF3	Immunoglobulin superfamily member 3	135.1	6.07	2.376	0.286204
PROS1	Vitamin K-dependent protein S	75.1	5.67	2.369	0.263591
TRIM33	E3 ubiquitin-protein ligase TRIM33	122.5	6.67	2.366	0.255461
NUMB	Protein numb homolog	70.8	8.51	2.364	0.528984
MFN1	Mitofusin-1	84.1	6.33	2.364	0.379133
CMPK2	UMP-CMP kinase 2, mitochondrial	49.4	7.01	2.364	0.325442
ATP1B1	Sodium/potassium-transporting ATPase subunit beta-1	35	8.53	2.363	0.297386
PIR	Pirin	32.1	6.92	2.362	0.259989
TMTC3	Protein O-mannosyl-transferase TMTC3	103.9	8.87	2.359	0.263122
IGKC	Immunoglobulin kappa constant	11.8	6.52	2.359	0.166168
CWC22	Pre-mRNA-splicing factor CWC22 homolog	105.4	7.03	2.354	0.370916
IFIT1	Interferon-induced protein with tetratricopeptide repeats 1	55.3	7.2	2.353	0.168121
ACIN1	Apoptotic chromatin condensation inducer in the nucleus	151.8	6.43	2.35	0.370454
EIF2B5	Translation initiation factor eIF-2B subunit epsilon	80.3	5.08	2.343	0.270876
F13A1	Coagulation factor XIII A chain	83.2	6.09	2.341	0.158599
ALCAM	CD166 antigen	65.1	6.25	2.339	0.415667
GUCY1A1	Guanylate cyclase soluble subunit alpha-1	77.4	7.11	2.338	0.476138
PYCARD-AS1	Putative uncharacterized protein PYCARD-AS1	21.9	11.33	2.335	0.305497
F10	Coagulation factor X	54.7	5.94	2.333	0.378346
MCM4	DNA replication licensing factor MCM4	96.5	6.74	2.333	0.303952
IGHV4-34	Immunoglobulin heavy variable 4-34	13.8	9.33	2.333	0.174096
SPHK1	Sphingosine kinase 1	42.5	7.11	2.332	0.476138
EPB41	Protein 4.1	97	5.58	2.332	0.274268
SYNE2	Nesprin-2	795.9	5.36	2.331	0.234381
C1QB	Complement C1q subcomponent subunit B	26.7	8.63	2.327	0.275226
LMAN1	Protein ERGIC-53	57.5	6.77	2.325	0.163746
EPS8L1	Epidermal growth factor receptor kinase substrate 8-like protein 1	80.2	6.04	2.324	0.359284
PKLR	Pyruvate kinase PKLR	61.8	7.74	2.32	0.379618
NUDT16	U8 snoRNA-decapping enzyme	21.3	6.89	2.315	0.362233
TXNL1	Thioredoxin-like protein 1	32.2	4.96	2.301	0.292142
ARL15	ADP-ribosylation factor-like protein 15	22.9	5.63	2.297	0.421062
CXADR	Coxsackievirus and adenovirus receptor	40	7.56	2.296	0.402567
CCAR2	Cell cycle and apoptosis regulator protein 2	102.8	5.22	2.284	0.320497
IGKV3-20	Immunoglobulin kappa variable 3-20	12.5	4.96	2.282	0.192396
HMGB3	High mobility group protein B3	23	8.37	2.281	0.276108
PRKD2	Serine/threonine-protein kinase D2	96.7	6.84	2.278	0.324901
ITGA1	Integrin alpha-1	130.8	6.29	2.265	0.298348
C8G	Complement component C8 gamma chain	22.3	8.31	2.253	0.332714
ITGB1	Integrin beta-1	88.4	5.39	2.251	0.205552
OAS2	2'-5'-oligoadenylate synthase 2	82.4	8.25	2.247	0.207274
DCAKD	Dephospho-CoA kinase domain-containing protein	26.5	9.58	2.245	0.445619
COL4A5	Collagen alpha-5(IV) chain	160.9	7.62	2.241	0.515182
INTS10	Integrator complex subunit 10	82.2	7.44	2.236	0.49175
WASF2	Wiskott-Aldrich syndrome protein family member 2	54.3	5.53	2.234	0.331599
NUP210	Nuclear pore membrane glycoprotein 210	205	6.81	2.231	0.380928
APEX1	DNA-(apurinic or apyrimidinic site) endonuclease	35.5	8.12	2.23	0.213311
IGHV3-64	Immunoglobulin heavy variable 3-64	12.9	7.85	2.223	0.434206
SAMD9L	Sterile alpha motif domain-containing protein 9-like	184.4	8.02	2.218	0.436302
PCBP3	Poly(rC)-binding protein 3	39.4	8.07	2.218	0.413254
SMARCA2	Probable global transcription activator SNF2L2	181.2	7.2	2.217	0.336816
IGLV1-47	Immunoglobulin lambda variable 1-47	12.3	5.91	2.215	0.3411
GTF3C4	General transcription factor 3C polypeptide 4	91.9	6.65	2.214	0.32476
NUCB1	Nucleobindin-1	53.8	5.25	2.212	0.417008
DNAJC10	DnaJ homolog subfamily C member 10	91	7.18	2.207	0.380323
FCN3	Ficolin-3	32.9	6.67	2.206	0.423559
CD36	Platelet glycoprotein 4	53	7.96	2.205	0.486184
TDRD1	Tudor domain-containing protein 1	131.9	6.34	2.198	0.438496
SLFN5	Schlafen family member 5	101	8.22	2.194	0.343003
AGPAT2	1-acyl-sn-glycerol-3-phosphate acyltransferase beta	30.9	9.01	2.193	0.434206
LPCAT1	Lysophosphatidylcholine acyltransferase 1	59.1	6.02	2.19	0.425785
MME	Neprilysin	85.5	5.73	2.187	0.431164
COG6	Conserved oligomeric Golgi complex subunit 6	73.2	5.76	2.181	0.530406
ANK1	Ankyrin-1	206.1	6.01	2.175	0.231325
RAB18	Ras-related protein Rab-18	23	5.24	2.174	0.266266
CLIP2	CAP-Gly domain-containing linker protein 2	115.8	6.73	2.171	0.502283
SARNP	SAP domain-containing ribonucleoprotein	23.7	6.42	2.167	0.434206
IFIT5	Interferon-induced protein with tetratricopeptide repeats 5	55.8	7.4	2.166	0.473696
C2	Complement C2	83.2	7.42	2.166	0.452575
PELP1	Proline-, glutamic acid- and leucine-rich protein 1	119.6	4.34	2.166	0.392505
CRIP2	Cysteine-rich protein 2	22.5	8.72	2.163	0.485939
ALAD	Delta-aminolevulinic acid dehydratase	36.3	6.79	2.161	0.267371
EPB42	Protein 4.2	77	8.09	2.161	0.245551
H1-10	Histone H1.10	22.5	10.76	2.159	0.373179
GNAQ	Guanine nucleotide-binding protein G(q) subunit alpha	42.1	5.68	2.149	0.33957
IGLV3-9	Immunoglobulin lambda variable 3-9	12.3	7.39	2.147	0.323274
CEMIP2	Cell surface hyaluronidase	154.3	8.15	2.146	0.540515
MAPK13	Mitogen-activated protein kinase 13	42.1	8.38	2.144	0.509303
UGT1A6	UDP-glucuronosyltransferase 1-6	60.7	8.41	2.142	0.370916
DUSP23	Dual specificity protein phosphatase 23	16.6	8.21	2.142	0.34278
KNG1	Kininogen-1	71.9	6.81	2.14	0.255461
A2M	Alpha-2-macroglobulin	163.2	6.46	2.137	0.256144
ACOT2	Acyl-coenzyme A thioesterase 2, mitochondrial	53.2	8.47	2.136	0.355216
DPP7	Dipeptidyl peptidase 2	54.3	6.32	2.135	0.407099
PSME4	Proteasome activator complex subunit 4	211.2	6.9	2.134	0.359284
APOH	Beta-2-glycoprotein 1	38.3	7.97	2.128	0.260577
WNT5A	Protein Wnt-5a	42.3	8.46	2.125	0.482664
COL6A6	Collagen alpha-6(VI) chain	247	6.89	2.125	0.348687
WDR81	WD repeat-containing protein 81	211.6	5.58	2.123	0.487575
IGLV1-51	Immunoglobulin lambda variable 1-51	12.2	7.03	2.123	0.421062
C1QC	Complement C1q subcomponent subunit C	25.8	8.41	2.122	0.263122
TSFM	Elongation factor Ts, mitochondrial	35.4	8.38	2.12	0.439692
C1R	Complement C1r subcomponent	80.1	6.21	2.12	0.370326
SLC12A5	Solute carrier family 12 member 5	126.1	6.73	2.115	0.581222
BCAT1	Branched-chain-amino-acid aminotransferase, cytosolic	42.9	5.3	2.105	0.418626
HNRNPA3	Heterogeneous nuclear ribonucleoprotein A3	39.6	9.01	2.093	0.277188
MYBBP1A	Myb-binding protein 1A	148.8	9.28	2.091	0.380928
FAHD1	Acylpyruvase FAHD1, mitochondrial	24.8	7.39	2.09	0.541708
TXNRD1	Thioredoxin reductase 1, cytoplasmic	70.9	7.39	2.088	0.400093
MRPS18A	39S ribosomal protein S18a, mitochondrial	22.2	10.33	2.087	0.586164
ALYREF	THO complex subunit 4	26.9	11.15	2.076	0.383159
MRPL39	39S ribosomal protein L39, mitochondrial	38.7	7.65	2.074	0.548676
SCCPDH	Saccharopine dehydrogenase-like oxidoreductase	47.1	9.14	2.074	0.433517
GPD2	Glycerol-3-phosphate dehydrogenase, mitochondrial	80.8	7.69	2.07	0.291191
XRCC1	DNA repair protein XRCC1	69.4	6.39	2.067	0.529205
PDLIM2	PDZ and LIM domain protein 2	37.4	8.72	2.064	0.404238
XPR1	Xenotropic and polytropic retrovirus receptor 1	81.5	8.44	2.062	0.522891
C18orf63	Uncharacterized protein C18orf63	77.2	9.8	2.06	0.364344
HMBS	Porphobilinogen deaminase	39.3	7.18	2.056	0.410234
APOE	Apolipoprotein E	36.1	5.73	2.05	0.34221
FMNL2	Formin-like protein 2	123.2	7.4	2.047	0.509303
PPA2	Inorganic pyrophosphatase 2, mitochondrial	37.9	7.39	2.044	0.43796
CFB	Complement factor B	85.5	7.06	2.043	0.306634
ORC3	Origin recognition complex subunit 3	82.2	7.61	2.04	0.676365
UBTF	Nucleolar transcription factor 1	89.4	5.81	2.039	0.539243
TFRC	Transferrin receptor protein 1	84.8	6.61	2.033	0.306634
CHMP6	Charged multivesicular body protein 6	23.5	5.31	2.032	0.554776
UAP1	UDP-N-acetylhexosamine pyrophosphorylase	58.7	6.33	2.03	0.436424
STOM	Stomatin	31.7	7.88	2.028	0.314954
SCD5	Stearoyl-CoA desaturase 5	37.6	9.61	2.023	0.546218
C1S	Complement C1s subcomponent	76.6	4.96	2.022	0.417008
IGF2BP2	Insulin-like growth factor 2 mRNA-binding protein 2	66.1	8.46	2.02	0.426533
CYFIP1	Cytoplasmic FMR1-interacting protein 1	145.1	6.9	2.02	0.320001
MAP1B	Microtubule-associated protein 1B	270.5	4.81	2.017	0.614666
WDR18	WD repeat-containing protein 18	47.4	6.7	2.015	0.444925
GTF3C1	General transcription factor 3C polypeptide 1	238.7	7.3	2.014	0.591281
IL4I1	L-amino-acid oxidase	62.8	8.68	2.014	0.528202
THOC5	THO complex subunit 5 homolog	78.5	6.87	2.013	0.548289
MSI2	RNA-binding protein Musashi homolog 2	35.2	8.48	2.013	0.546683
FBLN2	Fibulin-2	126.5	4.82	2.013	0.431977
ALDH6A1	Methylmalonate-semialdehyde dehydrogenase [acylating], mitochondrial	57.8	8.5	2.011	0.476138
IGKV4-1	Immunoglobulin kappa variable 4-1	13.4	5.25	2.01	0.325313
TRIM22	E3 ubiquitin-protein ligase TRIM22	56.9	7.72	2.008	0.433517
EP300	Histone acetyltransferase p300	264	8.5	2.005	0.546218
ITGA3	Integrin alpha-3	116.5	6.77	2.001	0.43796
DCAF7	DDB1- and CUL4-associated factor 7	38.9	5.52	2	0.571557
RXRG	Retinoic acid receptor RXR-gamma	50.8	7.62	2	0.554717
RNF40	E3 ubiquitin-protein ligase BRE1B	113.6	6.29	1.994	0.600635
SORBS3	Vinexin	75.3	9.45	1.993	0.50443
P4HA1	Prolyl 4-hydroxylase subunit alpha-1	61	6.01	1.984	0.420207
C8orf82	UPF0598 protein C8orf82	23.9	9.14	1.982	0.597187
ISG15	Ubiquitin-like protein ISG15	17.9	7.44	1.982	0.342204
P3H1	Prolyl 3-hydroxylase 1	83.3	5.14	1.981	0.420207
PTPA	Serine/threonine-protein phosphatase 2A activator	40.6	5.94	1.973	0.347524
TMEM258	Transmembrane protein 258	9.1	5.83	1.972	0.652374
CNPY2	Protein canopy homolog 2	20.6	4.92	1.972	0.648611
GAA	Lysosomal alpha-glucosidase	105.3	6	1.969	0.350329
HBA1	Hemoglobin subunit alpha	15.2	8.68	1.967	0.352028
MT-ATP6	ATP synthase subunit a	24.8	10.1	1.964	0.348687
HNRNPR	Heterogeneous nuclear ribonucleoprotein R	70.9	8.13	1.963	0.354534
NUP50	Nuclear pore complex protein Nup50	50.1	7.06	1.958	0.357465
STAT2	Signal transducer and activator of transcription 2	97.9	5.49	1.957	0.383159
PTPRE	Receptor-type tyrosine-protein phosphatase epsilon	80.6	7.02	1.956	0.613546
TBPL1	TATA box-binding protein-like 1	20.9	9.54	1.955	0.652374
GSTO1	Glutathione S-transferase omega-1	27.5	6.6	1.955	0.359284
TALDO1	Transaldolase	37.5	6.81	1.954	0.35955
RDH13	Retinol dehydrogenase 13	35.9	8.1	1.952	0.655984
DRG1	Developmentally-regulated GTP-binding protein 1	40.5	8.9	1.95	0.392505
IGKV1-8	Immunoglobulin kappa variable 1-8	12.5	9.01	1.949	0.433517
GALM	Galactose mutarotase	37.7	6.65	1.948	0.581222
RHCE	Blood group Rh(CE) polypeptide	45.5	9.36	1.947	0.485522
NT5DC1	5'-nucleotidase domain-containing protein 1	51.8	6.35	1.947	0.434006
APLP2	Amyloid-like protein 2	86.9	4.79	1.941	0.617985
TSR1	Pre-rRNA-processing protein TSR1 homolog	91.8	7.42	1.94	0.637851
IFIT3	Interferon-induced protein with tetratricopeptide repeats 3	56	5.2	1.94	0.490579
ELAC2	Zinc phosphodiesterase ELAC protein 2	92.2	7.9	1.939	0.597187
NCBP2	Nuclear cap-binding protein subunit 2	18	8.21	1.939	0.596327
PFN2	Profilin-2	15	6.99	1.938	0.399632
SPTBN5	Spectrin beta chain, non-erythrocytic 5	416.5	6.65	1.932	0.433517
UAP1L1	UDP-N-acetylhexosamine pyrophosphorylase-like protein 1	57	6.32	1.928	0.473927
PNKP	Bifunctional polynucleotide phosphatase/kinase	57	8.46	1.927	0.476244
FZD6	Frizzled-6	79.2	7.96	1.926	0.614807
DECR1	2,4-dienoyl-CoA reductase [(3E)-enoyl-CoA-producing], mitochondrial	36	9.28	1.926	0.344017
CKMT1A	Creatine kinase U-type, mitochondrial	47	8.34	1.924	0.377794
ACTR1B	Beta-centractin	42.3	6.4	1.923	0.664473
VTN	Vitronectin	54.3	5.8	1.923	0.378346
EPB41L1	Band 4.1-like protein 1	98.4	5.62	1.917	0.61708
NAGA	Alpha-N-acetylgalactosaminidase	46.5	5.19	1.915	0.648611
FGB	Fibrinogen beta chain	55.9	8.27	1.915	0.382592
BLVRB	Flavin reductase (NADPH)	22.1	7.65	1.914	0.383159
STAM	Signal transducing adapter molecule 1	59.1	4.82	1.91	0.615255
HBQ1	Hemoglobin subunit theta-1	15.5	7.62	1.91	0.608528
GMPS	GMP synthase [glutamine-hydrolyzing]	76.7	6.87	1.91	0.424384
CYP2S1	Cytochrome P450 2S1	55.8	8.62	1.906	0.513708
CCDC6	Coiled-coil domain-containing protein 6	53.3	7.34	1.905	0.667836
AFG2A	ATPase family protein 2 homolog	97.8	5.66	1.901	0.635851
RNF213	E3 ubiquitin-protein ligase RNF213	591	6.48	1.9	0.50519
DIP2B	Disco-interacting protein 2 homolog B	171.4	8.09	1.9	0.501352
RHAG	Ammonium transporter Rh type A	44.2	6.84	1.899	0.49116
NARS1	Asparagine--tRNA ligase, cytoplasmic	62.9	6.25	1.897	0.371181
NUDT5	ADP-sugar pyrophosphatase	24.3	4.94	1.891	0.554717
CPNE2	Copine-2	61.2	6.07	1.89	0.635417
MTHFD1	C-1-tetrahydrofolate synthase, cytoplasmic	101.5	7.3	1.888	0.40134
XAB2	Pre-mRNA-splicing factor SYF1	99.9	6.23	1.887	0.434006
MSH2	DNA mismatch repair protein Msh2	104.7	5.77	1.886	0.533429
MRPL3	39S ribosomal protein L3, mitochondrial	38.6	9.48	1.885	0.664663
IDO1	Indoleamine 2,3-dioxygenase 1	45.3	7.3	1.884	0.640987
C8A	Complement component C8 alpha chain	65.1	6.47	1.881	0.573182
SERPINF1	Pigment epithelium-derived factor	46.3	6.38	1.879	0.518725
RAB27B	Ras-related protein Rab-27B	24.6	5.52	1.878	0.52523
HABP2	Hyaluronan-binding protein 2	62.6	6.54	1.875	0.655984
NCAPG	Condensin complex subunit 3	114.3	5.59	1.874	0.648382
COL3A1	Collagen alpha-1(III) chain	138.5	6.61	1.874	0.539243
CA2	Carbonic anhydrase 2	29.2	7.4	1.874	0.4107
HSD17B11	Estradiol 17-beta-dehydrogenase 11	32.9	9.07	1.872	0.648611
HDGF	Hepatoma-derived growth factor	26.8	4.73	1.866	0.394565
CIRBP	Cold-inducible RNA-binding protein	18.6	9.51	1.863	0.664473
SMU1	WD40 repeat-containing protein SMU1	57.5	7.18	1.863	0.58041
POSTN	Periostin	93.3	7.53	1.863	0.418134
GLS	Glutaminase kidney isoform, mitochondrial	73.4	7.77	1.863	0.407099
CHID1	Chitinase domain-containing protein 1	44.9	8.63	1.861	0.51829
COL6A1	Collagen alpha-1(VI) chain	108.5	5.43	1.861	0.476138
C5	Complement C5	188.2	6.52	1.854	0.491222
C8B	Complement component C8 beta chain	67	8.13	1.848	0.50519
PHLDB2	Pleckstrin homology-like domain family B member 2	142.1	7.43	1.847	0.72811
SSB	Lupus La protein	46.8	7.12	1.846	0.438648
ACAP2	Arf-GAP with coiled-coil, ANK repeat and PH domain-containing protein 2	88	6.8	1.845	0.548708
MCM7	DNA replication licensing factor MCM7	81.3	6.46	1.844	0.623071
KHDRBS1	KH domain-containing, RNA-binding, signal transduction-associated protein 1	48.2	8.66	1.844	0.558231
CFH	Complement factor H	139	6.61	1.844	0.431431
EPHX1	Epoxide hydrolase 1	52.9	7.25	1.843	0.431881
DUT	Deoxyuridine 5'-triphosphate nucleotidohydrolase, mitochondrial	26.5	9.36	1.842	0.554717
CCS	Copper chaperone for superoxide dismutase	29	5.58	1.841	0.576741
TMEM11	Transmembrane protein 11, mitochondrial	21.5	7.36	1.839	0.569381
IGKV3D-11	Immunoglobulin kappa variable 3D-11	12.6	5.29	1.839	0.433517
LMCD1	LIM and cysteine-rich domains protein 1	40.8	7.93	1.835	0.585942
TEP1	Telomerase protein component 1	290.3	7.97	1.835	0.554776
TMT1A	Methyltransferase-like protein 7A	28.3	8.38	1.827	0.664473
SLC25A11	Mitochondrial 2-oxoglutarate/malate carrier protein	34	9.91	1.825	0.439692
CAV2	Caveolin-2	18.3	5.27	1.822	0.591116
THY1	Thy-1 membrane glycoprotein	17.9	8.73	1.822	0.558687
PAFAH1B3	Platelet-activating factor acetylhydrolase IB subunit alpha1	25.7	6.84	1.822	0.539243
NHERF1	Na(+)/H(+) exchange regulatory cofactor NHE-RF1	38.8	5.77	1.82	0.679522
ARHGAP5	Rho GTPase-activating protein 5	172.4	6.62	1.82	0.652374
PPIG	Peptidyl-prolyl cis-trans isomerase G	88.6	10.29	1.817	0.65526
ZNF207	BUB3-interacting and GLEBS motif-containing protein ZNF207	50.7	9.1	1.817	0.650744
C6	Complement component C6	104.7	6.76	1.817	0.576766
TRIM32	E3 ubiquitin-protein ligase TRIM32	71.9	6.98	1.817	0.447532
GNA13	Guanine nucleotide-binding protein subunit alpha-13	44	8	1.816	0.67043
CPSF2	Cleavage and polyadenylation specificity factor subunit 2	88.4	5.11	1.812	0.655875
HLA-F	HLA class I histocompatibility antigen, alpha chain F	39	5.57	1.811	0.689431
TMEM63A	CSC1-like protein 1	92.1	7.27	1.811	0.679473
HLA-H	Putative HLA class I histocompatibility antigen, alpha chain H	40.9	6.3	1.811	0.50064
GLUL	Glutamine synthetase	42	6.89	1.806	0.580069
CNDP2	Cytosolic non-specific dipeptidase	52.8	5.97	1.805	0.460314
RHOT1	Mitochondrial Rho GTPase 1	70.7	6.27	1.804	0.723546
FGG	Fibrinogen gamma chain	51.5	5.62	1.804	0.460483
IGKV1-17	Immunoglobulin kappa variable 1-17	12.8	8.68	1.803	0.573182
NAXE	NAD(P)H-hydrate epimerase	31.7	7.66	1.801	0.586164
CDKN2AIP	CDKN2A-interacting protein	61.1	9.01	1.8	0.696109
SRSF11	Serine/arginine-rich splicing factor 11	53.5	10.52	1.797	0.723546
FKBP10	Peptidyl-prolyl cis-trans isomerase FKBP10	64.2	5.62	1.797	0.591116
UBE3A	Ubiquitin-protein ligase E3A	100.6	5.22	1.796	0.692755
HAGH	Hydroxyacylglutathione hydrolase, mitochondrial	33.8	8.12	1.794	0.622779
THRAP3	Thyroid hormone receptor-associated protein 3	108.6	10.15	1.792	0.588474
PNPLA6	Patatin-like phospholipase domain-containing protein 6	150.9	7.74	1.79	0.707656
CMTR1	Cap-specific mRNA (nucleoside-2'-O-)-methyltransferase 1	95.3	7.05	1.788	0.714673
IDH2	Isocitrate dehydrogenase [NADP], mitochondrial	50.9	8.69	1.787	0.476138
HLA-A	HLA class I histocompatibility antigen, A alpha chain	40.8	6	1.785	0.476515
ACSL1	Long-chain-fatty-acid--CoA ligase 1	77.9	7.15	1.784	0.584101
C3	Complement C3	187	6.4	1.784	0.47677
RPP40	Ribonuclease P protein subunit p40	41.8	6.67	1.783	0.681179
SPRYD4	SPRY domain-containing protein 4	23.1	6.93	1.78	0.598538
SLC2A3	Solute carrier family 2, facilitated glucose transporter member 3	53.9	7.2	1.78	0.588932
PSAT1	Phosphoserine aminotransferase	40.4	7.66	1.78	0.554776
POLD1	DNA polymerase delta catalytic subunit	123.6	7.03	1.776	0.592926
TMPRSS11D	Transmembrane protease serine 11D	46.2	8.38	1.775	0.607276
RPS4Y1	40S ribosomal protein S4, Y isoform 1	29.4	10.24	1.774	0.612111
RBM12	RNA-binding protein 12	97.3	8.63	1.774	0.597155
MSH6	DNA mismatch repair protein Msh6	152.7	6.9	1.771	0.679522
CA1	Carbonic anhydrase 1	28.9	7.12	1.771	0.487105
PDS5A	Sister chromatid cohesion protein PDS5 homolog A	150.7	7.91	1.77	0.632233
ETFDH	Electron transfer flavoprotein-ubiquinone oxidoreductase, mitochondrial	68.5	7.55	1.769	0.648611
IGHG2	Immunoglobulin heavy constant gamma 2	35.9	7.59	1.769	0.487368
TMEM65	Transmembrane protein 65	25.5	8.6	1.768	0.714866
GALK2	N-acetylgalactosamine kinase	50.3	6.61	1.768	0.713338
COL1A2	Collagen alpha-2(I) chain	129.2	8.95	1.767	0.637865
ACTL6A	Actin-like protein 6A	47.4	5.6	1.767	0.476138
NT5E	5'-nucleotidase	63.3	7.03	1.766	0.68473
PRPF40A	Pre-mRNA-processing factor 40 homolog A	108.7	7.56	1.765	0.600635
LRG1	Leucine-rich alpha-2-glycoprotein	38.2	6.95	1.765	0.585942
NASP	Nuclear autoantigenic sperm protein	85.2	4.3	1.764	0.732561
KRT2	Keratin, type II cytoskeletal 2 epidermal	65.4	8	1.763	0.49116
SPTA1	Spectrin alpha chain, erythrocytic 1	279.8	5.05	1.762	0.554043
MYO1B	Unconventional myosin-Ib	131.9	9.38	1.762	0.491435
OXA1L	Mitochondrial inner membrane protein OXA1L	48.5	9.45	1.758	0.688122
UXS1	UDP-glucuronic acid decarboxylase 1	47.5	8.94	1.757	0.734262
CDK2	Cyclin-dependent kinase 2	33.9	8.68	1.757	0.717244
HDAC6	Histone deacetylase 6	131.3	5.3	1.751	0.694382
ATP5F1A	ATP synthase subunit alpha, mitochondrial	59.7	9.13	1.751	0.50218
CD59	CD59 glycoprotein	14.2	6.48	1.75	0.524015
ATP5F1B	ATP synthase subunit beta, mitochondrial	56.5	5.4	1.75	0.502283
ORMDL3	ORM1-like protein 3	17.5	9.64	1.749	0.615255
SPTB	Spectrin beta chain, erythrocytic	246.3	5.27	1.748	0.487368
CRTAP	Cartilage-associated protein	46.5	5.73	1.746	0.601662
SLC39A14	Metal cation symporter ZIP14	54.2	5.33	1.745	0.694139
CASP6	Caspase-6	33.3	6.93	1.743	0.730179
FUT8	Alpha-(1,6)-fucosyltransferase	66.5	7.66	1.743	0.722674
CTBP2	C-terminal-binding protein 2	48.9	6.95	1.742	0.700164
UBA2	SUMO-activating enzyme subunit 2	71.2	5.29	1.74	0.575658
MRI1	Methylthioribose-1-phosphate isomerase	39.1	6.3	1.738	0.723546
TEX10	Testis-expressed protein 10	105.6	9.36	1.738	0.635056
PLOD1	Procollagen-lysine,2-oxoglutarate 5-dioxygenase 1	83.5	6.95	1.737	0.482664
RBBP4	Histone-binding protein RBBP4	47.6	4.89	1.736	0.51386
VCL	Vinculin	123.7	5.66	1.736	0.513708
LARS2	Probable leucine--tRNA ligase, mitochondrial	101.9	8.22	1.74	0.662417
ECI1	Enoyl-CoA delta isomerase 1, mitochondrial	32.8	8.54	1.735	0.618917
SYMPK	Symplekin	141.1	6.13	1.734	0.635417
SPTLC1	Serine palmitoyltransferase 1	52.7	6.01	1.734	0.62386
IGKV2-29	Immunoglobulin kappa variable 2-29	13.1	7.28	1.734	0.514329
A1BG	Alpha-1B-glycoprotein	54.2	5.86	1.733	0.490701
PAPOLA	Poly(A) polymerase alpha	82.8	7.37	1.73	0.708505
ATP5F1EP2	ATP synthase subunit epsilon-like protein, mitochondrial	5.8	10.14	1.73	0.637851
UBA7	Ubiquitin-like modifier-activating enzyme 7	111.6	6.04	1.729	0.72811
PTPN23	Tyrosine-protein phosphatase non-receptor type 23	178.9	6.92	1.725	0.653111
FUCA1	Tissue alpha-L-fucosidase	53.7	6.84	1.721	0.655984
ALDH2	Aldehyde dehydrogenase, mitochondrial	56.3	7.05	1.72	0.526232
CD9	CD9 antigen	25.4	7.15	1.719	0.527406
KCTD15	BTB/POZ domain-containing protein KCTD15	31.9	7.44	1.717	0.762636
RMDN1	Regulator of microtubule dynamics protein 1	35.8	8.5	1.715	0.667923
RRM1	Ribonucleoside-diphosphate reductase large subunit	90	7.15	1.713	0.610106
RNASE7	Ribonuclease 7	17.4	9.69	1.71	0.676365
SMAD2	Mothers against decapentaplegic homolog 2	52.3	6.58	1.707	0.769046
PRORP	Mitochondrial ribonuclease P catalytic subunit	67.3	8.78	1.706	0.758113
ACADVL	Very long-chain specific acyl-CoA dehydrogenase, mitochondrial	70.3	8.75	1.703	0.540277
AKR1C3	Aldo-keto reductase family 1 member C3	36.8	7.94	1.702	0.540515
CHD3	Chromodomain-helicase-DNA-binding protein 3	226.5	7.3	1.701	0.652374
SOD2	Superoxide dismutase [Mn], mitochondrial	24.7	8.25	1.701	0.540904
PGRMC2	Membrane-associated progesterone receptor component 2	23.8	4.88	1.7	0.655984
C1QL3	Complement C1q-like protein 3	26.7	6.79	1.697	0.674736
FERMT3	Fermitin family homolog 3	75.9	6.98	1.697	0.585942
CHERP	Calcium homeostasis endoplasmic reticulum protein	103.6	9.04	1.695	0.749444
SF3A1	Splicing factor 3A subunit 1	88.8	5.22	1.695	0.655984
SH3PXD2A	SH3 and PX domain-containing protein 2A	125.2	8.9	1.694	0.773112
ZNF326	DBIRD complex subunit ZNF326	65.6	5.15	1.694	0.734583
RBBP7	Histone-binding protein RBBP7	47.8	5.05	1.694	0.714595
ECE1	Endothelin-converting enzyme 1	87.1	5.88	1.694	0.672966
IGLV7-46	Immunoglobulin lambda variable 7-46	12.5	7.2	1.694	0.666325
BPHL	Valacyclovir hydrolase	32.5	9.14	1.693	0.655984
ASMTL	Probable bifunctional dTTP/UTP pyrophosphatase/methyltransferase protein	68.8	6.07	1.69	0.769046
FKBP3	Peptidyl-prolyl cis-trans isomerase FKBP3	25.2	9.28	1.69	0.616154
RDH11	Retinol dehydrogenase 11	35.4	8.82	1.689	0.622259
FBXO3	F-box only protein 3	54.5	5	1.69	0.571327
TLR2	Toll-like receptor 2	89.8	6.61	1.688	0.741589
ALDH1L2	Mitochondrial 10-formyltetrahydrofolate dehydrogenase	101.7	6.52	1.688	0.739042
PRMT1	Protein arginine N-methyltransferase 1	42.4	5.35	1.688	0.596327
H1-0	Histone H1.0	20.9	10.84	1.687	0.655984
COX6C	Cytochrome c oxidase subunit 6C	8.8	10.39	1.686	0.577196
CELF1	CUGBP Elav-like family member 1	52	8.46	1.684	0.730179
HDGFL2	Hepatoma-derived growth factor-related protein 2	74.3	7.49	1.684	0.72811
DYSF	Dysferlin	237.1	5.64	1.683	0.659386
TRAPPC4	Trafficking protein particle complex subunit 4	24.3	6.21	1.683	0.554717
PARP12	Protein mono-ADP-ribosyltransferase PARP12	79	8.51	1.682	0.768282
SHMT2	Serine hydroxymethyltransferase, mitochondrial	56	8.53	1.68	0.575021
F2	Prothrombin	70	5.9	1.68	0.554717
HLA-DPB1	HLA class II histocompatibility antigen, DP beta 1 chain	29.1	8.57	1.679	0.768282
FCGRT	IgG receptor FcRn large subunit p51	39.7	6.54	1.679	0.756401
PRPF39	Pre-mRNA-processing factor 39	78.4	5.4	1.678	0.833254
PHPT1	14 kDa phosphohistidine phosphatase	13.8	6.07	1.678	0.68473
CNP	2',3'-cyclic-nucleotide 3'-phosphodiesterase	47.5	9.07	1.676	0.654494
PNN	Pinin	81.6	7.14	1.675	0.779184
RAE1	mRNA export factor	40.9	7.83	1.675	0.669202
CCAR1	Cell division cycle and apoptosis regulator protein 1	132.7	5.76	1.674	0.744624
POLR2H	DNA-directed RNA polymerases I, II, and III subunit RPABC3	17.1	4.68	1.674	0.674479
AKR1C1	Aldo-keto reductase family 1 member C1	36.8	7.88	1.673	0.563919
IFIH1	Interferon-induced helicase C domain-containing protein 1	116.6	5.52	1.672	0.784304
USP11	Ubiquitin carboxyl-terminal hydrolase 11	109.7	5.45	1.672	0.733025
DEK	Protein DEK	42.6	8.56	1.671	0.676219
GIMAP8	GTPase IMAP family member 8	74.8	8.34	1.67	0.72811
ODR4	Protein odr-4 homolog	51.1	5.92	1.669	0.74106
SLC1A5	Neutral amino acid transporter B(0)	56.6	5.48	1.667	0.65839
CTR9	RNA polymerase-associated protein CTR9 homolog	133.4	6.77	1.666	0.730179
POLR2A	DNA-directed RNA polymerase II subunit RPB1	217	7.37	1.664	0.700787
SERPINA1	Alpha-1-antitrypsin	46.7	5.59	1.664	0.571557
RRP1	Ribosomal RNA processing protein 1 homolog A	52.8	9.33	1.663	0.761567
KYAT3	Kynurenine--oxoglutarate transaminase 3	51.4	8.19	1.663	0.752157
RANBP9	Ran-binding protein 9	77.8	6.79	1.66	0.795414
SCFD2	Sec1 family domain-containing protein 2	75.1	6.68	1.658	0.734659
SLMAP	Sarcolemmal membrane-associated protein	95.1	5.47	1.658	0.703243
SERPING1	Plasma protease C1 inhibitor	55.1	6.55	1.657	0.577196
ATP5F1C	ATP synthase subunit gamma, mitochondrial	33	9.22	1.657	0.577196
SAA4	Serum amyloid A-4 protein	14.7	9.07	1.655	0.640803
GDA	Guanine deaminase	51	5.68	1.654	0.700164
SF3B1	Splicing factor 3B subunit 1	145.7	7.09	1.654	0.553339
SERPINB13	Serpin B13	44.2	5.71	1.653	0.610437
PARVA	Alpha-parvin	42.2	5.95	1.652	0.677727
RUFY3	Protein RUFY3	52.9	5.49	1.65	0.767961
UBR5	E3 ubiquitin-protein ligase UBR5	309.2	5.85	1.65	0.763235
APCS	Serum amyloid P-component	25.4	6.54	1.646	0.587059
MPP1	55 kDa erythrocyte membrane protein	52.3	7.37	1.645	0.769142
HBD	Hemoglobin subunit delta	16	8.05	1.645	0.587512
NRP1	Neuropilin-1	103.1	5.88	1.644	0.773112
LRRC8A	Volume-regulated anion channel subunit LRRC8A	94.1	7.94	1.643	0.692755
SSR1	Translocon-associated protein subunit alpha	32.2	4.49	1.643	0.689907
PEPD	Xaa-Pro dipeptidase	54.5	6	1.642	0.589403
SERPINB4	Serpin B4	44.8	6.21	1.641	0.673672
ANP32B	Acidic leucine-rich nuclear phosphoprotein 32 family member B	28.8	4.06	1.64	0.615255
HNRNPK	Heterogeneous nuclear ribonucleoprotein K	50.9	5.54	1.639	0.591281
DLG1	Disks large homolog 1	100.4	5.76	1.636	0.626063
CARMIL1	F-actin-uncapping protein LRRC16A	151.5	7.85	1.634	0.81007
EXOSC10	Exosome component 10	100.8	8.46	1.634	0.802525
FAM120A	Constitutive coactivator of PPAR-gamma-like protein 1	121.8	8.88	1.634	0.724545
PUS1	tRNA pseudouridine synthase A	47.4	8.41	1.632	0.770555
CFP	Properdin	51.2	7.9	1.632	0.758527
ARHGEF2	Rho guanine nucleotide exchange factor 2	111.5	7.27	1.632	0.741589
RBM8A	RNA-binding protein 8A	19.9	5.72	1.632	0.702836
ITIH1	Inter-alpha-trypsin inhibitor heavy chain H1	101.3	6.79	1.632	0.597155
SAFB	Scaffold attachment factor B1	102.6	5.47	1.631	0.723546
HPR	Haptoglobin-related protein	39	7.09	1.631	0.700164
ILF3	Interleukin enhancer-binding factor 3	95.3	8.76	1.631	0.597187
RPF2	Ribosome production factor 2 homolog	35.6	9.99	1.629	0.708392
ATP5PO	ATP synthase subunit O, mitochondrial	23.3	9.96	1.629	0.599209
KLKB1	Plasma kallikrein	71.3	8.22	1.628	0.698926
PRPSAP2	Phosphoribosyl pyrophosphate synthase-associated protein 2	40.9	7.44	1.626	0.730179
C1QBP	Complement component 1 Q subcomponent-binding protein, mitochondrial	31.3	4.84	1.626	0.674479
TPMT	Thiopurine S-methyltransferase	28.2	6.23	1.625	0.730179
PRKCI	Protein kinase C iota type	68.2	5.85	1.624	0.762895
ARL2	ADP-ribosylation factor-like protein 2	20.9	6.34	1.624	0.603511
TCEA1	Transcription elongation factor A protein 1	33.9	8.38	1.622	0.740636
EXOC3L1	Exocyst complex component 3-like protein	81.6	5.6	1.618	0.760027
SF3B2	Splicing factor 3B subunit 2	100.2	5.67	1.618	0.722674
ATP5F1D	ATP synthase subunit delta, mitochondrial	17.5	5.49	1.618	0.720111
HP	Haptoglobin	45.2	6.58	1.618	0.609916
SELENOI	Ethanolaminephosphotransferase 1	45.2	6.6	1.616	0.792088
LIMA1	LIM domain and actin-binding protein 1	85.2	6.84	1.616	0.714866
HACD3	Very-long-chain (3R)-3-hydroxyacyl-CoA dehydratase 3	43.1	8.94	1.616	0.714508
DPYSL2	Dihydropyrimidinase-related protein 2	62.3	6.38	1.616	0.610437
DHCR7	7-dehydrocholesterol reductase	54.5	8.7	1.614	0.709098
HEATR1	HEAT repeat-containing protein 1	242.2	6.54	1.612	0.795414
NXN	Nucleoredoxin	48.4	4.97	1.612	0.692755
LPA	Apolipoprotein(a)	501	5.88	1.61	0.709098
SERPIND1	Heparin cofactor 2	57	6.9	1.61	0.65526
SERPINH1	Serpin H1	46.4	8.69	1.61	0.614807
FAM98B	Protein FAM98B	45.5	8.69	1.608	0.736174
ATP5MG	ATP synthase subunit g, mitochondrial	11.4	9.64	1.607	0.635056
CD68	Macrosialin	37.4	8.87	1.606	0.683619
TRIM25	E3 ubiquitin/ISG15 ligase TRIM25	70.9	8.09	1.606	0.642891
ABHD11	Protein ABHD11	34.7	9.48	1.605	0.770555
EDC4	Enhancer of mRNA-decapping protein 4	151.6	5.86	1.603	0.661066
RAB23	Ras-related protein Rab-23	26.6	6.6	1.602	0.775049
HLA-C	HLA class I histocompatibility antigen, C alpha chain	40.6	6.04	1.602	0.622241
ITGB5	Integrin beta-5	88	6.06	1.601	0.775049
IPO11	Importin-11	112.5	5.25	1.599	0.775049
INF2	Inverted formin-2	135.5	5.38	1.599	0.743901
EIF2AK2	Interferon-induced, double-stranded RNA-activated protein kinase	62.1	8.4	1.598	0.68962
DUOX1	Dual oxidase 1	177.1	7.9	1.6	0.702661
ATP2A2	Sarcoplasmic/endoplasmic reticulum calcium ATPase 2	114.7	5.34	1.597	0.626063
ANK3	Ankyrin-3	480.1	6.49	1.596	0.81404
UBE2H	Ubiquitin-conjugating enzyme E2 H	20.6	4.67	1.596	0.785461
ASPH	Aspartyl/asparaginyl beta-hydroxylase	85.8	5.01	1.596	0.6526
PUM3	Pumilio homolog 3	73.5	9.64	1.595	0.793582
FNDC3B	Fibronectin type III domain-containing protein 3B	132.8	5.95	1.594	0.776698
UGDH	UDP-glucose 6-dehydrogenase	55	7.12	1.594	0.606683
COL6A3	Collagen alpha-3(VI) chain	343.5	6.68	1.593	0.700164
CDC73	Parafibromin	60.5	9.61	1.591	0.77952
ISOC2	Isochorismatase domain-containing protein 2	22.3	7.77	1.591	0.72811
GPC1	Glypican-1	61.6	7.3	1.589	0.762901
HBB	Hemoglobin subunit beta	16	7.28	1.588	0.635711
XPO1	Exportin-1	123.3	6.06	1.586	0.657752
FBXO7	F-box only protein 7	58.5	6.55	1.584	0.752558
EXOSC3	Exosome complex component RRP40	29.6	8.1	1.584	0.639863
SRSF9	Serine/arginine-rich splicing factor 9	25.5	8.65	1.582	0.79571
CAST	Calpastatin	76.5	5.07	1.58	0.762901
COPG2	Coatomer subunit gamma-2	97.6	5.81	1.58	0.665407
BCLAF1	Bcl-2-associated transcription factor 1	106.1	9.98	1.579	0.798107
DOCK1	Dedicator of cytokinesis protein 1	215.2	7.56	1.577	0.720111
CALD1	Caldesmon	93.2	5.66	1.577	0.648421
ECM1	Extracellular matrix protein 1	60.6	6.71	1.575	0.812037
PIGS	GPI transamidase component PIG-S	61.6	6.49	1.575	0.802068
SUPT16H	FACT complex subunit SPT16	119.8	5.66	1.575	0.730179
GBA1	Lysosomal acid glucosylceramidase	59.7	7.61	1.573	0.650754
IGLC2	Immunoglobulin lambda constant 2	11.3	7.24	1.573	0.650744
ITPRIP	Inositol 1,4,5-trisphosphate receptor-interacting protein	62	5.88	1.572	0.81404
PIK3CA	Phosphatidylinositol 4,5-bisphosphate 3-kinase catalytic subunit alpha isoform	124.2	7.23	1.571	0.796965
TCIRG1	V-type proton ATPase 116 kDa subunit a3	92.9	7.12	1.57	0.831585
PABPN1	Polyadenylate-binding protein 2	32.7	5.06	1.57	0.739042
CPN1	Carboxypeptidase N catalytic chain	52.3	7.34	1.57	0.724545
TAGLN	Transgelin	22.6	8.84	1.57	0.652374
POLB	DNA polymerase beta	38.2	8.95	1.569	0.736174
FXR1	Fragile X mental retardation syndrome-related protein 1	69.7	6.15	1.569	0.652764
NIPSNAP3A	Protein NipSnap homolog 3A	28.4	9.16	1.567	0.730179
PDIA5	Protein disulfide-isomerase A5	59.6	7.91	1.567	0.714508
MAP1S	Microtubule-associated protein 1S	112.1	7.3	1.566	0.786349
BACC1	Chromatin complexes subunit BAP18	17.9	7.33	1.563	0.805122
HBE1	Hemoglobin subunit epsilon	16.2	8.63	1.563	0.716452
SMARCA5	SWI/SNF-related matrix-associated actin-dependent regulator of chromatin subfamily A member 5	121.8	8.09	1.562	0.769046
SGPL1	Sphingosine-1-phosphate lyase 1	63.5	9.16	1.562	0.730179
PTK7	Inactive tyrosine-protein kinase 7	118.3	7.09	1.562	0.718161
RCC2	Protein RCC2	56	8.78	1.56	0.655984
ISOC1	Isochorismatase domain-containing protein 1	32.2	7.39	1.559	0.825063
ERLEC1	Endoplasmic reticulum lectin 1	54.8	6.28	1.559	0.794756
PNPT1	Polyribonucleotide nucleotidyltransferase 1, mitochondrial	85.9	7.77	1.559	0.768282
RBBP5	Retinoblastoma-binding protein 5	59.1	5.1	1.559	0.741589
EPN3	Epsin-3	68.2	5.91	1.558	0.831585
MBOAT7	Lysophospholipid acyltransferase 7	52.7	8.97	1.558	0.766156
ERGIC1	Endoplasmic reticulum-Golgi intermediate compartment protein 1	32.6	7.06	1.557	0.724545
WDR12	Ribosome biogenesis protein WDR12	47.7	5.9	1.556	0.813813
COL6A2	Collagen alpha-2(VI) chain	108.5	6.21	1.556	0.736174
PRDX6	Peroxiredoxin-6	25	6.38	1.554	0.661794
LNPK	Endoplasmic reticulum junction formation protein lunapark	47.7	5.11	1.552	0.835487
NOSIP	Nitric oxide synthase-interacting protein	33.2	8.82	1.552	0.798475
SMS	Spermine synthase	41.2	5.02	1.551	0.708031
LIN7C	Protein lin-7 homolog C	21.8	8.43	1.55	0.792088
PRKDC	DNA-dependent protein kinase catalytic subunit	468.8	7.12	1.55	0.664473
ACAT2	Acetyl-CoA acetyltransferase, cytosolic	41.3	6.92	1.549	0.736174
LRP1	Prolow-density lipoprotein receptor-related protein 1	504.3	5.39	1.548	0.743901
AKR1B10	Aldo-keto reductase family 1 member B10	36	7.84	1.548	0.665071
HRG	Histidine-rich glycoprotein	59.5	7.5	1.547	0.708505
CDK1	Cyclin-dependent kinase 1	34.1	8.4	1.545	0.800905
MCM6	DNA replication licensing factor MCM6	92.8	5.41	1.545	0.766156
CHAMP1	Chromosome alignment-maintaining phosphoprotein 1	89	8.44	1.543	0.804432
STING1	Stimulator of interferon genes protein	42.2	7.05	1.543	0.760567
ATP5MK	ATP synthase membrane subunit K, mitochondrial	6.5	9.76	1.541	0.769046
MRPL10	39S ribosomal protein L10, mitochondrial	29.3	9.58	1.539	0.813813
TFCP2	Alpha-globin transcription factor CP2	57.2	5.8	1.538	0.835807
AGO2	Protein argonaute-2	97.1	9.19	1.538	0.77589
WDR3	WD repeat-containing protein 3	106	6.64	1.537	0.83833
BAG3	BAG family molecular chaperone regulator 3	61.6	6.95	1.537	0.833254
FCER1G	High affinity immunoglobulin epsilon receptor subunit gamma	9.7	7.12	1.537	0.772704
VDAC2	Voltage-dependent anion-selective channel protein 2	31.5	7.56	1.537	0.673672
HDAC1	Histone deacetylase 1	55.1	5.48	1.535	0.762636
LAMB2	Laminin subunit beta-2	195.9	6.52	1.534	0.77952
KIF5B	Kinesin-1 heavy chain	109.6	6.51	1.534	0.700164
ISG20	Interferon-stimulated gene 20 kDa protein	20.4	8.92	1.532	0.781557
CSTF3	Cleavage stimulation factor subunit 3	82.9	8.12	1.532	0.768282
SH3PXD2B	SH3 and PX domain-containing protein 2B	101.5	8.69	1.531	0.762761
ATP5MF	ATP synthase subunit f, mitochondrial	10.9	9.67	1.531	0.724049
U2SURP	U2 snRNP-associated SURP motif-containing protein	118.2	8.47	1.529	0.781557
ATP5ME	ATP synthase subunit e, mitochondrial	7.9	9.35	1.528	0.762901
OAT	Ornithine aminotransferase, mitochondrial	48.5	7.03	1.527	0.722674
NMI	N-myc-interactor	35	5.34	1.526	0.831585
SLC29A1	Equilibrative nucleoside transporter 1	50.2	8.29	1.525	0.847142
PSME2	Proteasome activator complex subunit 2	27.4	5.73	1.523	0.687068
SPPL2A	Signal peptide peptidase-like 2A	58.1	8.32	1.522	0.847354
RANBP10	Ran-binding protein 10	67.2	6.77	1.522	0.692084
TMEM38B	Trimeric intracellular cation channel type B	32.5	9.06	1.52	0.781557
GLRX5	Glutaredoxin-related protein 5, mitochondrial	16.6	6.79	1.519	0.826234
SERPINA6	Corticosteroid-binding globulin	45.1	6.04	1.518	0.794756
CFI	Complement factor I	65.7	7.5	1.517	0.772423
PDXP	Chronophin	31.7	6.55	1.516	0.833254
CDH3	Cadherin-3	91.4	4.75	1.515	0.798475
MARCKS	Myristoylated alanine-rich C-kinase substrate	31.5	4.45	1.515	0.768865
ATP5PD	ATP synthase subunit d, mitochondrial	18.5	5.3	1.514	0.741589
ATP5PB	ATP synthase F(0) complex subunit B1, mitochondrial	28.9	9.36	1.513	0.695758
XPO7	Exportin-7	123.8	6.32	1.512	0.782391
SRSF7	Serine/arginine-rich splicing factor 7	27.4	11.82	1.512	0.760504
PRDX2	Peroxiredoxin-2	21.9	5.97	1.512	0.696994
HPRT1	Hypoxanthine-guanine phosphoribosyltransferase	24.6	6.68	1.511	0.724687
PKN2	Serine/threonine-protein kinase N2	112	6.3	1.51	0.842889
LARP1	La-related protein 1	123.4	8.82	1.51	0.775049
CSNK2B	Casein kinase II subunit beta	24.9	5.55	1.51	0.767399
XPOT	Exportin-T	109.9	5.39	1.509	0.794756
PDHX	Pyruvate dehydrogenase protein X component, mitochondrial	54.1	8.66	1.508	0.842143
GLG1	Golgi apparatus protein 1	134.5	6.9	1.507	0.7004
ALDH1B1	Aldehyde dehydrogenase X, mitochondrial	57.2	6.8	1.506	0.795751
CD163	Scavenger receptor cysteine-rich type 1 protein M130	125.4	5.95	1.506	0.774281
CTNNA2	Catenin alpha-2	105.2	5.71	1.506	0.7733
TRIM47	E3 ubiquitin-protein ligase TRIM47	69.5	6.44	1.503	0.831585
IGLV3-10	Immunoglobulin lambda variable 3-10	12.4	4.83	1.503	0.775049
YWHAQ	14-3-3 protein theta	27.7	4.78	1.502	0.707535
CD109	CD109 antigen	161.6	5.85	1.501	0.795414
SCRIB	Protein scribble homolog	174.8	5.07	1.501	0.708392
DDX17	Probable ATP-dependent RNA helicase DDX17	80.2	8.27	1.5	0.708392
DDX27	Probable ATP-dependent RNA helicase DDX27	89.8	9.28	1.499	0.876004
IDH3B	Isocitrate dehydrogenase [NAD] subunit beta, mitochondrial	42.2	8.46	1.497	0.788829
NONO	Non-POU domain-containing octamer-binding protein	54.2	8.95	1.497	0.711464
STUB1	E3 ubiquitin-protein ligase CHIP	34.8	5.87	1.494	0.86151
CD38	ADP-ribosyl cyclase/cyclic ADP-ribose hydrolase 1	34.3	7.66	1.494	0.82549
TGFB1I1	Transforming growth factor beta-1-induced transcript 1 protein	49.8	7.03	1.491	0.828941
HELZ2	Helicase with zinc finger domain 2	294.5	7.49	1.49	0.849438
NID1	Nidogen-1	136.3	5.29	1.488	0.812011
KDELR2	ER lumen protein-retaining receptor 2	24.4	8.72	1.488	0.770555
BPGM	Bisphosphoglycerate mutase	30	6.54	1.488	0.718869
SLC25A10	Mitochondrial dicarboxylate carrier	31.3	9.54	1.487	0.832681
PRPF38B	Pre-mRNA-splicing factor 38B	64.4	10.54	1.486	0.833254
PSIP1	PC4 and SFRS1-interacting protein	60.1	9.13	1.485	0.795415
ALDOC	Fructose-bisphosphate aldolase C	39.4	6.87	1.484	0.72194
KLC1	Kinesin light chain 1	65.3	6.2	1.483	0.812321
FLOT1	Flotillin-1	47.3	7.49	1.482	0.811254
TBC1D2B	TBC1 domain family member 2B	109.8	6.16	1.479	0.804432
TFAM	Transcription factor A, mitochondrial	29.1	9.72	1.478	0.792557
POGZ	Pogo transposable element with ZNF domain	155.2	7.4	1.477	0.861113
HGH1	Protein HGH1 homolog	42.1	4.81	1.477	0.833254
HEBP2	Heme-binding protein 2	22.9	4.63	1.475	0.79571
DDX39B	Spliceosome RNA helicase DDX39B	49	5.67	1.475	0.724545
TGM1	Protein-glutamine gamma-glutamyltransferase K	89.7	6.04	1.475	0.724545
CTHRC1	Collagen triple helix repeat-containing protein 1	26.2	7.99	1.474	0.849438
TMX1	Thioredoxin-related transmembrane protein 1	31.8	4.98	1.474	0.724973
NBAS	Neuroblastoma-amplified sequence	268.4	5.96	1.473	0.831585
APOA1	Apolipoprotein A-I	30.8	5.76	1.473	0.724976
ECPAS	Proteasome adapter and scaffold protein ECM29	204.2	7.12	1.47	0.807963
DHX9	ATP-dependent RNA helicase A	140.9	6.84	1.47	0.72811
LAMA5	Laminin subunit alpha-5	399.5	7.02	1.469	0.842014
PRPF31	U4/U6 small nuclear ribonucleoprotein Prp31	55.4	5.78	1.468	0.83833
GUSB	Beta-glucuronidase	74.7	7.02	1.467	0.79571
BSG	Basigin	42.2	5.66	1.467	0.739724
NIF3L1	NIF3-like protein 1	41.9	6.65	1.466	0.775049
EHD4	EH domain-containing protein 4	61.1	6.76	1.466	0.758527
PARP10	Protein mono-ADP-ribosyltransferase PARP10	109.9	4.97	1.465	0.846195
ANG	Angiogenin	16.5	9.64	1.464	0.828941
PFAS	Phosphoribosylformylglycinamidine synthase	144.6	5.76	1.462	0.820865
TMEM256	Transmembrane protein 256	11.7	8.94	1.461	0.794756
CAND1	Cullin-associated NEDD8-dissociated protein 1	136.3	5.78	1.461	0.730841
CLTA	Clathrin light chain A	27.1	4.51	1.46	0.862813
IDI1	Isopentenyl-diphosphate Delta-isomerase 1	26.3	6.34	1.46	0.831585
HNRNPC	Heterogeneous nuclear ribonucleoproteins C1/C2	33.7	5.08	1.46	0.732561
APOC1	Apolipoprotein C-I	9.3	8.47	1.459	0.857027
CPSF7	Cleavage and polyadenylation specificity factor subunit 7	52	8	1.459	0.762901
PPP2R2A	Serine/threonine-protein phosphatase 2A 55 kDa regulatory subunit B alpha isoform	51.7	6.2	1.458	0.796397
HBG1	Hemoglobin subunit gamma-1	16.1	7.2	1.458	0.723546
IGHV1-2	Immunoglobulin heavy variable 1-2	13.1	9.13	1.456	0.771029
ARHGEF16	Rho guanine nucleotide exchange factor 16	80.1	7.36	1.455	0.851534
CYTH1	Cytohesin-1	46.4	5.54	1.455	0.849438
SLC25A1	Tricarboxylate transport protein, mitochondrial	34	9.89	1.455	0.758527
ILVBL	2-hydroxyacyl-CoA lyase 2	67.8	8.15	1.454	0.820865
DPYSL3	Dihydropyrimidinase-related protein 3	61.9	6.49	1.454	0.736174
NELFB	Negative elongation factor B	65.7	6.13	1.453	0.842014
CDC42BPB	Serine/threonine-protein kinase MRCK beta	194.2	6.37	1.452	0.846873
VCAN	Versican core protein	372.6	4.51	1.449	0.831585
NXF1	Nuclear RNA export factor 1	70.1	8.51	1.449	0.814701
GTPBP4	GTP-binding protein 4	73.9	9.5	1.449	0.81404
COX20	Cytochrome c oxidase assembly protein COX20, mitochondrial	13.3	8.76	1.448	0.863476
CNOT7	CCR4-NOT transcription complex subunit 7	32.7	4.84	1.448	0.858166
HNRNPAB	Heterogeneous nuclear ribonucleoprotein A/B	36.2	8.21	1.447	0.762636
LGALS8	Galectin-8	35.8	8.25	1.446	0.877209
IGKV6-21	Immunoglobulin kappa variable 6-21	12.4	7.28	1.446	0.86151
PPP2R5E	Serine/threonine-protein phosphatase 2A 56 kDa regulatory subunit epsilon isoform	54.7	6.95	1.445	0.81404
SCO1	Protein SCO1 homolog, mitochondrial	33.8	8.88	1.444	0.831585
MMGT1	ER membrane protein complex subunit 5	14.7	9.16	1.443	0.877209
PLIN4	Perilipin-4	134.3	8.73	1.443	0.842014
CS	Citrate synthase, mitochondrial	51.7	8.32	1.443	0.746843
EIF2B4	Translation initiation factor eIF-2B subunit delta	57.5	9.38	1.442	0.862813
ACP1	Low molecular weight phosphotyrosine protein phosphatase	18	6.74	1.442	0.812011
KIF1B	Kinesin-like protein KIF1B	204.3	5.6	1.441	0.866147
PHKB	Phosphorylase b kinase regulatory subunit beta	124.8	6.95	1.44	0.852256
ACOX1	Peroxisomal acyl-coenzyme A oxidase 1	74.4	8.16	1.438	0.831585
FKBP11	Peptidyl-prolyl cis-trans isomerase FKBP11	22.2	9.39	1.438	0.79571
CTBP1	C-terminal-binding protein 1	47.5	6.77	1.434	0.824519
GIT2	ARF GTPase-activating protein GIT2	84.5	7.23	1.433	0.838413
SFPQ	Splicing factor, proline- and glutamine-rich	76.1	9.44	1.433	0.758527
SLC44A1	Choline transporter-like protein 1	73.3	8.6	1.432	0.83156
NACA2	Nascent polypeptide-associated complex subunit alpha-2	23.2	4.73	1.432	0.760508
MIA3	Transport and Golgi organization protein 1 homolog	213.6	4.84	1.431	0.851534
MCCC2	Methylcrotonoyl-CoA carboxylase beta chain, mitochondrial	61.3	7.68	1.431	0.842014
PPAT	Amidophosphoribosyltransferase	57.4	6.76	1.43	0.86151
SRI	Sorcin	21.7	5.59	1.43	0.822838
UBQLN2	Ubiquilin-2	65.7	5.22	1.429	0.842143
PDGFRB	Platelet-derived growth factor receptor beta	123.9	4.98	1.429	0.828502
SF1	Splicing factor 1	68.3	8.98	1.429	0.798209
CUL2	Cullin-2	86.9	6.92	1.426	0.867601
TUBB4A	Tubulin beta-4A chain	49.6	4.88	1.426	0.811992
UROD	Uroporphyrinogen decarboxylase	40.8	6.14	1.425	0.828941
EHD2	EH domain-containing protein 2	61.1	6.46	1.425	0.81404
RAB13	Ras-related protein Rab-13	22.8	9.19	1.423	0.900196
NECTIN1	Nectin-1	57.1	6.1	1.423	0.873429
H6PD	GDH/6PGL endoplasmic bifunctional protein	88.8	7.3	1.423	0.83833
GNL1	Guanine nucleotide-binding protein-like 1	68.6	5.8	1.423	0.833254
SNCA	Alpha-synuclein	14.5	4.7	1.422	0.873759
SLC16A1	Monocarboxylate transporter 1	53.9	8.66	1.422	0.815178
HNRNPA0	Heterogeneous nuclear ribonucleoprotein A0	30.8	9.29	1.422	0.813813
PGD	6-phosphogluconate dehydrogenase, decarboxylating	53.1	7.23	1.422	0.766577
RENBP	N-acylglucosamine 2-epimerase	48.8	6.37	1.42	0.881352
MLEC	Malectin	32.2	5.41	1.418	0.843259
TBL1XR1	F-box-like/WD repeat-containing protein TBL1XR1	55.6	5.55	1.416	0.871312
TRAF2	TNF receptor-associated factor 2	55.8	7.53	1.416	0.861905
PPT1	Palmitoyl-protein thioesterase 1	34.2	6.52	1.416	0.842014
SFXN3	Sideroflexin-3	35.5	9.1	1.416	0.792945
ARF6	ADP-ribosylation factor 6	20.1	8.95	1.415	0.810384
IGHV1-3	Immunoglobulin heavy variable 1-3	13	9.55	1.415	0.77952
CAT	Catalase	59.7	7.39	1.414	0.770555
SRSF2	Serine/arginine-rich splicing factor 2	25.5	11.85	1.413	0.770555
NOMO1	Nodal modulator 1	134.2	5.81	1.41	0.898653
MALT1	Mucosa-associated lymphoid tissue lymphoma translocation protein 1	92.2	5.73	1.41	0.887622
SRSF1	Serine/arginine-rich splicing factor 1	27.7	10.36	1.41	0.794756
ILF2	Interleukin enhancer-binding factor 2	43	5.26	1.409	0.773112
WASF1	Wiskott-Aldrich syndrome protein family member 1	61.6	6.46	1.408	0.929955
LACTB2	Endoribonuclease LACTB2	32.8	6.8	1.406	0.851534
F11R	Junctional adhesion molecule A	32.6	7.9	1.406	0.842014
ADAM10	Disintegrin and metalloproteinase domain-containing protein 10	84.1	7.77	1.405	0.890092
SDF2	Stromal cell-derived factor 2	23	7.33	1.405	0.866907
INTS4	Integrator complex subunit 4	108.1	6.44	1.404	0.887622
MRC2	C-type mannose receptor 2	166.6	5.83	1.403	0.852349
GSN	Gelsolin	85.6	6.28	1.403	0.776698
POLR1A	DNA-directed RNA polymerase I subunit RPA1	194.7	7.03	1.402	0.863476
ME2	NAD-dependent malic enzyme, mitochondrial	65.4	7.61	1.402	0.855859
SERPINF2	Alpha-2-antiplasmin	54.5	6.29	1.402	0.842014
CALM3	Calmodulin-3	16.8	4.22	1.402	0.833254
UBE2O	(E3-independent) E2 ubiquitin-conjugating enzyme	141.2	5.12	1.401	0.871312
AGPS	Alkyldihydroxyacetonephosphate synthase, peroxisomal	72.9	7.34	1.401	0.779239
NT5C	5'(3')-deoxyribonucleotidase, cytosolic type	23.4	6.64	1.4	0.850449
SRSF3	Serine/arginine-rich splicing factor 3	19.3	11.65	1.4	0.779891
B4GALT4	Beta-1,4-galactosyltransferase 4	40	9.07	1.399	0.888822
KDELR1	ER lumen protein-retaining receptor 1	24.5	8.62	1.399	0.844611
DDX42	ATP-dependent RNA helicase DDX42	102.9	7.02	1.398	0.847142
AEBP1	Adipocyte enhancer-binding protein 1	130.8	5.11	1.398	0.843678
SRSF6	Serine/arginine-rich splicing factor 6	39.6	11.43	1.397	0.849135
LMAN2	Vesicular integral-membrane protein VIP36	40.2	6.95	1.397	0.800276
PCNA	Proliferating cell nuclear antigen	28.8	4.69	1.397	0.794756
CTSB	Cathepsin B	37.8	6.3	1.397	0.781557
PDCL3	Phosducin-like protein 3	27.6	4.84	1.396	0.906035
EXOC5	Exocyst complex component 5	81.8	6.71	1.396	0.851534
BAX	Apoptosis regulator BAX	21.2	5.22	1.396	0.782391
HINT2	Histidine triad nucleotide-binding protein 2, mitochondrial	17.2	9.16	1.394	0.842014
HNRNPD	Heterogeneous nuclear ribonucleoprotein D0	38.4	7.81	1.394	0.78489
AMPD2	AMP deaminase 2	100.6	6.93	1.393	0.847225
DDX60	Probable ATP-dependent RNA helicase DDX60	197.7	7.59	1.392	0.851534
IGHV1-46	Immunoglobulin heavy variable 1-46	12.9	8.92	1.391	0.877209
ANPEP	Aminopeptidase N	109.5	5.48	1.39	0.851534
ITGAV	Integrin alpha-V	116	5.68	1.389	0.792213
AKR1C2	Aldo-keto reductase family 1 member C2	36.7	7.49	1.389	0.790491
GFPT2	Glutamine--fructose-6-phosphate aminotransferase [isomerizing] 2	76.9	7.37	1.388	0.888822
MRPS30	39S ribosomal protein S30, mitochondrial	50.3	7.97	1.388	0.877209
PFKFB1	6-phosphofructo-2-kinase/fructose-2,6-bisphosphatase 1	54.6	6.58	1.388	0.866147
SLC9A1	Sodium/hydrogen exchanger 1	90.7	7.21	1.388	0.852442
NDUFS2	NADH dehydrogenase [ubiquinone] iron-sulfur protein 2, mitochondrial	52.5	7.55	1.388	0.849438
UBE2V2	Ubiquitin-conjugating enzyme E2 variant 2	16.4	8.09	1.388	0.849438
CDC42BPG	Serine/threonine-protein kinase MRCK gamma	172.4	6.28	1.387	0.881101
GCDH	Glutaryl-CoA dehydrogenase, mitochondrial	48.1	8.06	1.387	0.877209
XRN2	5'-3' exoribonuclease 2	108.5	7.47	1.387	0.846873
IDH3A	Isocitrate dehydrogenase [NAD] subunit alpha, mitochondrial	39.6	6.92	1.384	0.855073
CHD4	Chromodomain-helicase-DNA-binding protein 4	217.9	5.86	1.383	0.857027
IGKV3D-15	Immunoglobulin kappa variable 3D-15	12.5	5.19	1.383	0.856276
AZGP1	Zinc-alpha-2-glycoprotein	34.2	6.05	1.382	0.866907
OAS3	2'-5'-oligoadenylate synthase 3	121.1	8.4	1.382	0.795953
ACAD9	Complex I assembly factor ACAD9, mitochondrial	68.7	7.96	1.381	0.849438
UBE4B	Ubiquitin conjugation factor E4 B	146.1	6.55	1.38	0.904928
TOMM40	Mitochondrial import receptor subunit TOM40 homolog	37.9	7.25	1.38	0.861113
NDUFB8	NADH dehydrogenase [ubiquinone] 1 beta subcomplex subunit 8, mitochondrial	21.8	6.8	1.379	0.911597
LIMS1	LIM and senescent cell antigen-like-containing domain protein 1	37.2	8.05	1.379	0.83833
TBCD	Tubulin-specific chaperone D	132.5	6.19	1.378	0.899538
TCERG1	Transcription elongation regulator 1	123.8	8.65	1.377	0.869023
SMC3	Structural maintenance of chromosomes protein 3	141.5	7.18	1.377	0.866907
OLA1	Obg-like ATPase 1	44.7	7.81	1.377	0.79571
STAG2	Cohesin subunit SA-2	141.2	5.43	1.376	0.890949
SAE1	SUMO-activating enzyme subunit 1	38.4	5.3	1.376	0.831585
TLN1	Talin-1	269.6	6.07	1.375	0.797375
PTGES3	Prostaglandin E synthase 3	18.7	4.54	1.373	0.798475
ANP32E	Acidic leucine-rich nuclear phosphoprotein 32 family member E	30.7	3.85	1.372	0.881352
FLOT2	Flotillin-2	47	5.25	1.372	0.865456
P4HA2	Prolyl 4-hydroxylase subunit alpha-2	60.9	5.71	1.372	0.820865
SRRT	Serrate RNA effector molecule homolog	100.6	5.96	1.371	0.863476
SWAP70	Switch-associated protein 70	69	5.87	1.371	0.863
BLMH	Bleomycin hydrolase	52.5	6.27	1.371	0.861708
NECTIN2	Nectin-2	57.7	4.82	1.37	0.91397
RAB34	Ras-related protein Rab-34	29	7.88	1.37	0.89058
BPNT2	Golgi-resident adenosine 3',5'-bisphosphate 3'-phosphatase	38.7	6.86	1.369	0.91397
THUMPD1	THUMP domain-containing protein 1	39.3	7.88	1.369	0.884851
PDS5B	Sister chromatid cohesion protein PDS5 homolog B	164.6	8.47	1.367	0.896333
HPX	Hemopexin	51.6	7.02	1.366	0.805122
HP1BP3	Heterochromatin protein 1-binding protein 3	61.2	9.67	1.366	0.805122
NAV1	Neuron navigator 1	202.3	8.07	1.366	0.802068
AGPAT5	1-acyl-sn-glycerol-3-phosphate acyltransferase epsilon	42	9.1	1.365	0.901863
UBE4A	Ubiquitin conjugation factor E4 A	122.5	5.24	1.365	0.897834
C4B	Complement C4-B	192.6	7.27	1.364	0.808005
ARL3	ADP-ribosylation factor-like protein 3	20.4	7.24	1.363	0.86626
DCN	Decorin	39.7	8.54	1.361	0.868879
DHX15	Pre-mRNA-splicing factor ATP-dependent RNA helicase DHX15	90.9	7.46	1.361	0.810549
MARCHF5	E3 ubiquitin-protein ligase MARCHF5	31.2	8.7	1.359	0.910831
DHX36	ATP-dependent DNA/RNA helicase DHX36	114.7	7.68	1.359	0.898653
SET	Protein SET	33.5	4.32	1.358	0.794931
MAPRE2	Microtubule-associated protein RP/EB family member 2	37	5.57	1.357	0.900196
PLRG1	Pleiotropic regulator 1	57.2	9.17	1.357	0.861113
MYH10	Myosin-10	228.9	5.54	1.356	0.831585
TARS2	Threonine--tRNA ligase, mitochondrial	81	7.3	1.355	0.916224
GATD3B	Glutamine amidotransferase-like class 1 domain-containing protein 3B, mitochondrial	28.1	8.27	1.355	0.842014
SPATS2L	SPATS2-like protein	61.7	9.64	1.354	0.913989
VKORC1L1	Vitamin K epoxide reductase complex subunit 1-like protein 1	19.8	9.13	1.354	0.880542
HNRNPH1	Heterogeneous nuclear ribonucleoprotein H	49.2	6.3	1.351	0.818129
FRG1	Protein FRG1	29.2	9.01	1.35	0.911597
GYS1	Glycogen [starch] synthase, muscle	83.7	6.18	1.35	0.852349
ADK	Adenosine kinase	40.5	6.7	1.349	0.805122
CD2AP	CD2-associated protein	71.4	6.4	1.347	0.901697
LXN	Latexin	25.7	5.78	1.345	0.876004
HNRNPM	Heterogeneous nuclear ribonucleoprotein M	77.5	8.7	1.344	0.827245
CISD1	CDGSH iron-sulfur domain-containing protein 1	12.2	9.09	1.343	0.889131
ATP6V0C	V-type proton ATPase 16 kDa proteolipid subunit	15.7	8.44	1.343	0.884681
ACOT7	Cytosolic acyl coenzyme A thioester hydrolase	41.8	8.54	1.342	0.876004
SERPINC1	Antithrombin-III	52.6	6.71	1.342	0.82894
AMDHD2	N-acetylglucosamine-6-phosphate deacetylase	43.7	6.7	1.34	0.913989
SIGMAR1	Sigma non-opioid intracellular receptor 1	25.1	5.96	1.34	0.882583
ARL6IP6	ADP-ribosylation factor-like protein 6-interacting protein 6	24.7	6.33	1.339	0.909742
MCM3	DNA replication licensing factor MCM3	90.9	5.77	1.339	0.889739
QTRT1	Queuine tRNA-ribosyltransferase catalytic subunit 1	44	7.23	1.339	0.831585
CBL	E3 ubiquitin-protein ligase CBL	99.6	6.54	1.338	0.924512
CPNE3	Copine-3	60.1	5.85	1.338	0.831585
AGPAT3	1-acyl-sn-glycerol-3-phosphate acyltransferase gamma	43.4	8.72	1.337	0.913989
GRWD1	Glutamate-rich WD repeat-containing protein 1	49.4	4.92	1.337	0.88661
ADAM17	Disintegrin and metalloproteinase domain-containing protein 17	93	5.76	1.336	0.934537
UGGT2	UDP-glucose:glycoprotein glucosyltransferase 2	174.6	6.89	1.335	0.912615
MAGOH	Protein mago nashi homolog	17.2	6.11	1.335	0.869023
EDF1	Endothelial differentiation-related factor 1	16.4	9.95	1.334	0.913989
HSP90B1	Endoplasmin	92.4	4.84	1.334	0.831585
DDX46	Probable ATP-dependent RNA helicase DDX46	117.3	9.29	1.333	0.831585
TP53RK	EKC/KEOPS complex subunit TP53RK	28.1	9.54	1.332	0.898653
FUBP1	Far upstream element-binding protein 1	67.5	7.61	1.332	0.890963
SDHA	Succinate dehydrogenase [ubiquinone] flavoprotein subunit, mitochondrial	72.6	7.39	1.332	0.832681
PIGR	Polymeric immunoglobulin receptor	83.2	5.74	1.331	0.923399
HNRNPDL	Heterogeneous nuclear ribonucleoprotein D-like	46.4	9.57	1.331	0.890327
CFHR5	Complement factor H-related protein 5	64.4	7.06	1.33	0.911597
TLCD3A	TLC domain-containing protein 3A	29.4	9.41	1.33	0.911597
KHSRP	Far upstream element-binding protein 2	73.1	7.3	1.33	0.832681
DHX8	ATP-dependent RNA helicase DHX8	139.2	8.32	1.328	0.911597
SMC4	Structural maintenance of chromosomes protein 4	147.1	6.79	1.328	0.901697
ARHGAP17	Rho GTPase-activating protein 17	95.4	7.62	1.328	0.896333
EIF4A3	Eukaryotic initiation factor 4A-III	46.8	6.73	1.327	0.85076
RHOB	Rho-related GTP-binding protein RhoB	22.1	5.24	1.324	0.901697
HINT1	Histidine triad nucleotide-binding protein 1	13.8	6.95	1.324	0.873931
PTGR1	Prostaglandin reductase 1	35.8	8.29	1.323	0.898653
YIPF4	Protein YIPF4	27.1	4.65	1.321	0.913989
VPS4B	Vacuolar protein sorting-associated protein 4B	49.3	7.23	1.321	0.898653
MAL2	Protein MAL2	19.1	6.24	1.321	0.890132
RRBP1	Ribosome-binding protein 1	152.4	8.6	1.321	0.84124
SMC2	Structural maintenance of chromosomes protein 2	135.6	8.43	1.32	0.913989
TMEM205	Transmembrane protein 205	21.2	8.62	1.32	0.901614
CCDC186	Coiled-coil domain-containing protein 186	103.6	6.27	1.32	0.898653
CLIC4	Chloride intracellular channel protein 4	28.8	5.59	1.32	0.838413
NCBP1	Nuclear cap-binding protein subunit 1	91.8	6.43	1.319	0.899547
PECAM1	Platelet endothelial cell adhesion molecule	82.5	6.99	1.318	0.918399
PRKAR1A	cAMP-dependent protein kinase type I-alpha regulatory subunit	43	5.35	1.318	0.898653
MYADM	Myeloid-associated differentiation marker	35.3	8.15	1.318	0.897834
CPN2	Carboxypeptidase N subunit 2	60.5	5.99	1.317	0.926454
GNA11	Guanine nucleotide-binding protein subunit alpha-11	42.1	5.69	1.317	0.91941
HNRNPUL2	Heterogeneous nuclear ribonucleoprotein U-like protein 2	85.1	4.91	1.317	0.850449
HSPA9	Stress-70 protein, mitochondrial	73.6	6.16	1.317	0.842014
STK36	Serine/threonine-protein kinase 36	143.9	5.9	1.317	0.838605
NRM	Nurim	29.4	8.63	1.314	0.93021
SCAMP4	Secretory carrier-associated membrane protein 4	25.7	8.82	1.314	0.901614
BUB3	Mitotic checkpoint protein BUB3	37.1	6.84	1.314	0.871312
RBMX	RNA-binding motif protein, X chromosome	42.3	10.05	1.314	0.864274
FLNA	Filamin-A	280.6	6.06	1.314	0.842014
MT-CO2	Cytochrome c oxidase subunit 2	25.5	4.82	1.314	0.842014
UQCRFS1	Cytochrome b-c1 complex subunit Rieske, mitochondrial	29.6	8.32	1.313	0.835807
PSME1	Proteasome activator complex subunit 1	28.7	6.02	1.312	0.843395
MTCH2	Mitochondrial carrier homolog 2	33.3	7.97	1.311	0.898653
UBE2Z	Ubiquitin-conjugating enzyme E2 Z	38.2	5.62	1.311	0.844399
CYB5R2	NADH-cytochrome b5 reductase 2	31.4	8.5	1.31	0.901697
CLYBL	Citramalyl-CoA lyase, mitochondrial	37.3	8.73	1.309	0.93216
HGS	Hepatocyte growth factor-regulated tyrosine kinase substrate	86.1	6.16	1.308	0.903832
MINDY3	Ubiquitin carboxyl-terminal hydrolase MINDY-3	49.7	4.77	1.307	0.93021
DDX5	Probable ATP-dependent RNA helicase DDX5	69.1	8.92	1.307	0.849438
PPIP5K2	Inositol hexakisphosphate and diphosphoinositol-pentakisphosphate kinase 2	140.3	8.22	1.305	0.916614
CYB561D2	Transmembrane reductase CYB561D2	24	9.89	1.304	0.9208
DHX16	Pre-mRNA-splicing factor ATP-dependent RNA helicase DHX16	119.2	6.8	1.303	0.916614
VTI1B	Vesicle transport through interaction with t-SNAREs homolog 1B	26.7	9.04	1.302	0.935407
TM9SF1	Transmembrane 9 superfamily member 1	68.8	7.17	1.3	0.935098
PLXNA1	Plexin-A1	210.9	6.92	1.3	0.935098
ACE	Angiotensin-converting enzyme	149.6	6.39	1.3	0.924077
MTREX	Exosome RNA helicase MTR4	117.7	6.52	1.3	0.912919
SLC25A6	ADP/ATP translocase 3	32.8	9.74	1.3	0.850449
ZC3H7B	Zinc finger CCCH domain-containing protein 7B	109.8	7.25	1.299	0.923561
LRPPRC	Leucine-rich PPR motif-containing protein, mitochondrial	157.8	6.13	1.299	0.85076
SMG1	Serine/threonine-protein kinase SMG1	410.2	6.46	1.297	0.937525
PAPSS1	Bifunctional 3'-phosphoadenosine 5'-phosphosulfate synthase 1	70.8	6.86	1.297	0.91621
SAP18	Histone deacetylase complex subunit SAP18	17.6	9.35	1.297	0.911597
PTGES2	Prostaglandin E synthase 2	41.9	9.16	1.295	0.912615
ERLIN1	Erlin-1	39.1	7.87	1.294	0.935098
NPM3	Nucleoplasmin-3	19.3	4.63	1.294	0.923561
HADHB	Trifunctional enzyme subunit beta, mitochondrial	51.3	9.41	1.294	0.852575
DAPP1	Dual adapter for phosphotyrosine and 3-phosphotyrosine and 3-phosphoinositide	32.2	7.8	1.293	0.934537
CIAO1	Probable cytosolic iron-sulfur protein assembly protein CIAO1	37.8	4.97	1.292	0.943569
BRD4	Bromodomain-containing protein 4	152.1	9.19	1.292	0.933698
SNRNP200	U5 small nuclear ribonucleoprotein 200 kDa helicase	244.4	6.06	1.292	0.852349
DIP2A	Disco-interacting protein 2 homolog A	170.3	8.03	1.291	0.944163
ERAP2	Endoplasmic reticulum aminopeptidase 2	110.4	6.71	1.291	0.935407
GSTZ1	Maleylacetoacetate isomerase	24.2	8.54	1.29	0.944163
API5	Apoptosis inhibitor 5	59	7.34	1.29	0.913989
RBP4	Retinol-binding protein 4	23	6.07	1.29	0.903832
EIF5B	Eukaryotic translation initiation factor 5B	138.7	5.49	1.289	0.910906
SCAF4	SR-related and CTD-associated factor 4	125.8	9.55	1.288	0.94158
SIN3A	Paired amphipathic helix protein Sin3a	145.1	7.25	1.288	0.919147
VAT1	Synaptic vesicle membrane protein VAT-1 homolog	41.9	6.29	1.288	0.914803
UTP25	U3 small nucleolar RNA-associated protein 25 homolog	87	5.88	1.287	0.9422
TRAM2	Translocating chain-associated membrane protein 2	43.3	9.22	1.287	0.939562
NFS1	Cysteine desulfurase, mitochondrial	50.2	8.31	1.287	0.936681
INTS11	Integrator complex subunit 11	67.6	8.06	1.286	0.935098
MT-ND4	NADH-ubiquinone oxidoreductase chain 4	51.5	9.35	1.286	0.919147
PPP5C	Serine/threonine-protein phosphatase 5	56.8	6.28	1.285	0.918399
ACTN1	Alpha-actinin-1	103	5.41	1.284	0.861113
STIM1	Stromal interaction molecule 1	77.4	6.67	1.283	0.918399
RTKN	Rhotekin	62.6	7.44	1.283	0.86151
F8A1	40-kDa huntingtin-associated protein	39.1	6.84	1.281	0.933698
PDHA1	Pyruvate dehydrogenase E1 component subunit alpha, somatic form, mitochondrial	43.3	8.06	1.281	0.910831
CNN3	Calponin-3	36.4	6.05	1.28	0.921934
TKT	Transketolase	67.8	7.66	1.28	0.863476
GAPVD1	GTPase-activating protein and VPS9 domain-containing protein 1	164.9	5.22	1.279	0.898653
CTNNA1	Catenin alpha-1	100	6.29	1.279	0.863846
RALGAPA1	Ral GTPase-activating protein subunit alpha-1	229.7	6.19	1.278	0.944163
DKC1	H/ACA ribonucleoprotein complex subunit DKC1	57.6	9.42	1.278	0.912919
FCGR3A	Low affinity immunoglobulin gamma Fc region receptor III-A	29.1	8.07	1.277	0.933698
PKP2	Plakophilin-2	97.4	9.33	1.276	0.944163
HARS2	Histidine--tRNA ligase, mitochondrial	56.9	8.24	1.276	0.939562
CD63	CD63 antigen	25.6	7.81	1.276	0.922832
HNRNPU	Heterogeneous nuclear ribonucleoprotein U	90.5	6	1.276	0.866479
RAD21	Double-strand-break repair protein rad21 homolog	71.6	4.65	1.275	0.939562
GORASP2	Golgi reassembly-stacking protein 2	47.1	4.82	1.275	0.935098
RO60	60 kDa SS-A/Ro ribonucleoprotein	60.6	8.03	1.275	0.915353
ICAM1	Intercellular adhesion molecule 1	57.8	7.99	1.275	0.914899
LAMP2	Lysosome-associated membrane glycoprotein 2	44.9	5.63	1.274	0.90033
LARS1	Leucine--tRNA ligase, cytoplasmic	134.4	7.3	1.274	0.876004
QNG1	Queuosine salvage protein	39	5.88	1.272	0.935098
NAA25	N-alpha-acetyltransferase 25, NatB auxiliary subunit	112.2	6.64	1.272	0.929955
FN3KRP	Ketosamine-3-kinase	34.4	7.33	1.272	0.925821
ITGA5	Integrin alpha-5	114.5	5.77	1.271	0.937525
PYCR2	Pyrroline-5-carboxylate reductase 2	33.6	7.77	1.27	0.940652
APMAP	Adipocyte plasma membrane-associated protein	46.5	6.16	1.269	0.868879
FCGBP	IgGFc-binding protein	571.6	5.34	1.268	0.94158
TLE3	Transducin-like enhancer protein 3	83.4	7.2	1.268	0.939562
PRKACB	cAMP-dependent protein kinase catalytic subunit beta	40.6	8.78	1.268	0.933698
PRPS2	Ribose-phosphate pyrophosphokinase 2	34.7	6.61	1.268	0.91621
RAP1B	Ras-related protein Rap-1b	20.8	5.78	1.268	0.869023
TRIM2	Tripartite motif-containing protein 2	81.5	6.96	1.267	0.944163
FOXK1	Forkhead box protein K1	75.4	9.32	1.267	0.935407
TRIM28	Transcription intermediary factor 1-beta	88.5	5.77	1.267	0.900196
SERPINB6	Serpin B6	42.6	5.27	1.267	0.888822
PSMB9	Proteasome subunit beta type-9	23.3	5.03	1.266	0.884044
LEMD2	LEM domain-containing protein 2	56.9	9	1.265	0.918399
TMEM41A	Transmembrane protein 41A	29.6	9.03	1.263	0.944163
MCM5	DNA replication licensing factor MCM5	82.2	8.37	1.262	0.954468
IDH3G	Isocitrate dehydrogenase [NAD] subunit gamma, mitochondrial	42.8	8.5	1.26	0.933698
RAP1A	Ras-related protein Rap-1A	21	6.67	1.259	0.935098
CEBPZ	CCAAT/enhancer-binding protein zeta	120.9	5.94	1.258	0.947534
C11orf68	UPF0696 protein C11orf68	31.4	6.32	1.258	0.937525
U2AF1	Splicing factor U2AF 35 kDa subunit	27.9	8.81	1.258	0.933698
UQCRC2	Cytochrome b-c1 complex subunit 2, mitochondrial	48.4	8.63	1.258	0.877209
IGHV3-7	Immunoglobulin heavy variable 3-7	12.9	6.57	1.258	0.877209
KCNB2	Potassium voltage-gated channel subfamily B member 2	102.5	6.14	1.258	0.877209
UBAP2L	Ubiquitin-associated protein 2-like	114.5	7.11	1.257	0.944163
UTRN	Utrophin	394.2	5.33	1.257	0.943569
THOC6	THO complex subunit 6 homolog	37.5	7.43	1.257	0.942163
PURA	Transcriptional activator protein Pur-alpha	34.9	6.44	1.257	0.933698
HCFC1	Host cell factor 1	208.6	7.46	1.256	0.924512
MDH1	Malate dehydrogenase, cytoplasmic	36.4	7.36	1.256	0.878946
ADPGK	ADP-dependent glucokinase	54.1	6.2	1.255	0.94585
HNRNPL	Heterogeneous nuclear ribonucleoprotein L	64.1	8.22	1.255	0.881101
CRIP1	Cysteine-rich protein 1	8.5	8.75	1.254	0.933588
CLINT1	Clathrin interactor 1	68.2	6.42	1.252	0.941985
SIAE	Sialate O-acetylesterase	58.3	7.33	1.252	0.94158
CSNK2A1	Casein kinase II subunit alpha	45.1	7.74	1.251	0.933698
CDIPT	CDP-diacylglycerol--inositol 3-phosphatidyltransferase	23.5	8.03	1.251	0.929955
PRPF8	Pre-mRNA-processing-splicing factor 8	273.4	8.84	1.25	0.885577
KLHDC4	Kelch domain-containing protein 4	57.9	5.72	1.25	0.885577
LLGL1	Lethal(2) giant larvae protein homolog 1	115.3	6.29	1.249	0.935098
MNDA	Myeloid cell nuclear differentiation antigen	45.8	9.76	1.249	0.898653
USP39	U4/U6.U5 tri-snRNP-associated protein 2	65.3	8.91	1.248	0.940399
CLPTM1	Cleft lip and palate transmembrane protein 1	76	6.3	1.248	0.937525
NIPSNAP1	Protein NipSnap homolog 1	33.3	9.31	1.248	0.933431
TRRAP	Transformation/transcription domain-associated protein	437.3	8.19	1.247	0.97648
IVD	Isovaleryl-CoA dehydrogenase, mitochondrial	46.6	8.05	1.247	0.951415
UBE2I	SUMO-conjugating enzyme UBC9	18	8.66	1.247	0.933698
DNMT1	DNA (cytosine-5)-methyltransferase 1	183.1	7.75	1.247	0.933698
DHTKD1	Probable 2-oxoglutarate dehydrogenase E1 component DHKTD1, mitochondrial	103	6.93	1.246	0.949385
PSMD9	26S proteasome non-ATPase regulatory subunit 9	24.7	6.95	1.246	0.940652
SELENOT	Thioredoxin reductase-like selenoprotein T	22.3	8.6	1.246	0.939144
DYNC1I2	Cytoplasmic dynein 1 intermediate chain 2	71.4	5.2	1.246	0.937344
CPSF6	Cleavage and polyadenylation specificity factor subunit 6	59.2	7.15	1.246	0.935098
ERP29	Endoplasmic reticulum resident protein 29	29	7.31	1.246	0.93021
SOD1	Superoxide dismutase [Cu-Zn]	15.9	6.13	1.246	0.888822
PREX1	Phosphatidylinositol 3,4,5-trisphosphate-dependent Rac exchanger 1 protein	186.1	6.44	1.245	0.955388
CASP3	Caspase-3	31.6	6.54	1.245	0.933588
POLR2C	DNA-directed RNA polymerase II subunit RPB3	31.4	4.92	1.243	0.956496
NUP188	Nucleoporin NUP188	195.9	6.73	1.243	0.944163
SEPTIN11	Septin-11	49.4	6.81	1.243	0.890327
RAVER1	Ribonucleoprotein PTB-binding 1	63.8	8.48	1.242	0.940652
RTN3	Reticulon-3	112.5	4.96	1.242	0.900196
FKBP4	Peptidyl-prolyl cis-trans isomerase FKBP4	51.8	5.43	1.242	0.891935
GOLIM4	Golgi integral membrane protein 4	81.8	4.77	1.241	0.956496
NUP88	Nuclear pore complex protein Nup88	83.5	5.69	1.241	0.954487
CFAP20	Cilia- and flagella-associated protein 20	22.8	9.76	1.241	0.944163
DHX30	ATP-dependent RNA helicase DHX30	133.9	8.78	1.24	0.893061
TMEM161A	Transmembrane protein 161A	53.6	8.44	1.239	0.947534
RBM25	RNA-binding protein 25	100.1	6.32	1.239	0.935098
STARD9	StAR-related lipid transfer protein 9	516	6.32	1.239	0.89403
LSM3	U6 snRNA-associated Sm-like protein LSm3	11.8	4.7	1.238	0.954054
UNC93B1	Protein unc-93 homolog B1	66.6	6.96	1.237	0.955466
MYH11	Myosin-11	227.2	5.5	1.236	0.957042
MAGED2	Melanoma-associated antigen D2	64.9	9.32	1.235	0.957042
CDCP1	CUB domain-containing protein 1	92.9	7.96	1.235	0.945884
TMEM41B	Transmembrane protein 41B	32.5	9.58	1.235	0.940652
MT-CO3	Cytochrome c oxidase subunit 3	29.9	7.31	1.235	0.938406
NAP1L4	Nucleosome assembly protein 1-like 4	42.8	4.69	1.234	0.947032
DNAJC11	DnaJ homolog subfamily C member 11	63.2	8.4	1.234	0.941746
FETUB	Fetuin-B	42	6.83	1.233	0.947534
SRP14	Signal recognition particle 14 kDa protein	14.6	10.04	1.233	0.916224
GPI	Glucose-6-phosphate isomerase	63.1	8.32	1.233	0.898653
POGLUT1	Protein O-glucosyltransferase 1	46.2	8.72	1.232	0.963613
SRP54	Signal recognition particle 54 kDa protein	55.7	8.75	1.232	0.937344
AGT	Angiotensinogen	53.1	6.32	1.232	0.928154
TRIM26	Tripartite motif-containing protein 26	62.1	5.03	1.232	0.909742
SUN2	SUN domain-containing protein 2	80.3	6.73	1.231	0.942202
SEL1L	Protein sel-1 homolog 1	88.7	5.39	1.231	0.937344
IPO7	Importin-7	119.4	4.82	1.231	0.933698
HMGB2	High mobility group protein B2	24	7.81	1.231	0.916224
FKBP5	Peptidyl-prolyl cis-trans isomerase FKBP5	51.2	5.9	1.23	0.955432
TUBB8	Tubulin beta-8 chain	49.7	4.89	1.23	0.946153
PI4K2A	Phosphatidylinositol 4-kinase type 2-alpha	54	8.29	1.23	0.933698
PDCD11	Protein RRP5 homolog	208.6	8.87	1.229	0.956496
DTX3L	E3 ubiquitin-protein ligase DTX3L	83.5	8.06	1.229	0.946072
ESYT2	Extended synaptotagmin-2	102.3	9.26	1.228	0.957044
PIP4P1	Type 1 phosphatidylinositol 4,5-bisphosphate 4-phosphatase	29.5	8.91	1.227	0.947534
MCU	Calcium uniporter protein, mitochondrial	39.8	8.65	1.227	0.940652
PITRM1	Presequence protease, mitochondrial	117.3	6.92	1.226	0.944163
CD81	CD81 antigen	25.8	5.29	1.226	0.940399
ANP32A	Acidic leucine-rich nuclear phosphoprotein 32 family member A	28.6	4.09	1.226	0.920886
ARMH3	Armadillo-like helical domain-containing protein 3	78.7	6.6	1.225	0.947875
TKFC	Triokinase/FMN cyclase	58.9	7.49	1.224	0.94158
RIGI	Antiviral innate immune response receptor RIG-I	106.5	6.4	1.224	0.931457
PDIA3	Protein disulfide-isomerase A3	56.7	6.35	1.224	0.901863
DAP3	28S ribosomal protein S29, mitochondrial	45.5	8.88	1.223	0.954468
MGST3	Microsomal glutathione S-transferase 3	16.5	9.38	1.223	0.947534
PGAM1	Phosphoglycerate mutase 1	28.8	7.18	1.222	0.903217
AHCYL1	S-adenosylhomocysteine hydrolase-like protein 1	58.9	6.89	1.222	0.903217
TMEM97	Sigma intracellular receptor 2	20.8	9.38	1.221	0.956232
SF3A3	Splicing factor 3A subunit 3	58.8	5.38	1.221	0.947534
SRP9	Signal recognition particle 9 kDa protein	10.1	7.97	1.221	0.946153
YTHDF3	YTH domain-containing family protein 3	63.8	9.04	1.221	0.940652
AZU1	Azurocidin	26.9	9.5	1.221	0.904204
VARS1	Valine--tRNA ligase	140.4	7.59	1.221	0.902453
FMOD	Fibromodulin	43.2	6.04	1.22	0.968455
PHF5A	PHD finger-like domain-containing protein 5A	12.4	8.41	1.22	0.951463
GRB2	Growth factor receptor-bound protein 2	25.2	6.32	1.22	0.935098
BAG5	BAG family molecular chaperone regulator 5	51.2	6.05	1.218	0.964919
CD151	CD151 antigen	28.3	7.47	1.218	0.944163
REL	Proto-oncogene c-Rel	68.5	5.86	1.215	0.969732
DLST	Dihydrolipoyllysine-residue succinyltransferase component of 2-oxoglutarate dehydrogenase complex, mitochondrial	48.7	8.95	1.214	0.910831
NELFCD	Negative elongation factor C/D	66.2	5.1	1.213	0.969732
SRSF4	Serine/arginine-rich splicing factor 4	56.6	11.52	1.211	0.933698
STRIP1	Striatin-interacting protein 1	95.5	6.29	1.209	0.963863
ABHD14B	Protein ABHD14B	22.3	6.4	1.209	0.953731
PLSCR1	Phospholipid scramblase 1	35	4.94	1.209	0.953727
CRYZ	Quinone oxidoreductase	35.2	8.44	1.209	0.930502
GHDC	GH3 domain-containing protein	57.5	7.88	1.208	0.97212
NCK2	Cytoplasmic protein NCK2	42.9	6.95	1.208	0.969732
DIPK2A	Divergent protein kinase domain 2A	49.5	8.53	1.207	0.957571
TMEM33	Transmembrane protein 33	28	9.7	1.207	0.940652
SDHB	Succinate dehydrogenase [ubiquinone] iron-sulfur subunit, mitochondrial	31.6	8.76	1.207	0.936681
ALG2	Alpha-1,3/1,6-mannosyltransferase ALG2	47.1	7.05	1.206	0.964919
KPNA2	Importin subunit alpha-1	57.8	5.4	1.206	0.962702
RBM39	RNA-binding protein 39	59.3	10.1	1.206	0.956496
WDR5	WD repeat-containing protein 5	36.6	8.27	1.205	0.95649
HK1	Hexokinase-1	102.4	6.8	1.205	0.913989
ERAP1	Endoplasmic reticulum aminopeptidase 1	107.2	6.46	1.204	0.913989
ACYP1	Acylphosphatase-1	11.3	9.31	1.203	0.972376
APOB	Apolipoprotein B-100	515.3	7.05	1.202	0.915429
SEC23A	Protein transport protein Sec23A	86.1	7.08	1.202	0.911597
FCN1	Ficolin-1	35.1	6.86	1.201	0.970082
STMN1	Stathmin	17.3	5.97	1.201	0.956232
PAXX	Protein PAXX	21.6	5.48	1.2	0.971937
RFC2	Replication factor C subunit 2	39.1	6.44	1.2	0.96255
PARP9	Protein mono-ADP-ribosyltransferase PARP9	96.3	7.91	1.2	0.956496
PLCD1	1-phosphatidylinositol 4,5-bisphosphate phosphodiesterase delta-1	85.6	6.7	1.199	0.963451
ITGAM	Integrin alpha-M	127.1	7.23	1.199	0.947534
SUB1	Activated RNA polymerase II transcriptional coactivator p15	14.4	9.6	1.197	0.956289
GC	Vitamin D-binding protein	52.9	5.45	1.197	0.918399
EIF4G3	Eukaryotic translation initiation factor 4 gamma 3	176.5	5.38	1.196	0.97212
HNRNPA1	Heterogeneous nuclear ribonucleoprotein A1	38.7	9.13	1.196	0.918627
VDAC1	Voltage-dependent anion-selective channel protein 1	30.8	8.54	1.196	0.918627
RPTOR	Regulatory-associated protein of mTOR	148.9	6.89	1.195	0.963059
SLC25A12	Calcium-binding mitochondrial carrier protein Aralar1	74.7	8.38	1.195	0.957044
PAPSS2	Bifunctional 3'-phosphoadenosine 5'-phosphosulfate synthase 2	69.5	8.03	1.194	0.97212
KIAA1217	Sickle tail protein homolog	214	7.06	1.194	0.947534
GPR107	Protein GPR107	66.9	7.24	1.193	0.969621
PPIL1	Peptidyl-prolyl cis-trans isomerase-like 1	18.2	7.99	1.193	0.968455
UQCRC1	Cytochrome b-c1 complex subunit 1, mitochondrial	52.6	6.37	1.192	0.923875
POLR1E	DNA-directed RNA polymerase I subunit RPA49	47.2	8.94	1.19	0.974477
THOC2	THO complex subunit 2	182.7	8.44	1.19	0.973587
TRA2B	Transformer-2 protein homolog beta	33.6	11.25	1.19	0.973587
EMP3	Epithelial membrane protein 3	18.4	7.96	1.19	0.971713
NOC3L	Nucleolar complex protein 3 homolog	92.5	9.17	1.19	0.968455
IFIT2	Interferon-induced protein with tetratricopeptide repeats 2	54.6	6.76	1.19	0.959231
FHL2	Four and a half LIM domains protein 2	32.2	7.55	1.19	0.936133
LGALS3BP	Galectin-3-binding protein	65.3	5.27	1.189	0.933698
PRDX4	Peroxiredoxin-4	30.5	6.29	1.188	0.927762
SETD3	Actin-histidine N-methyltransferase	67.2	5.96	1.187	0.973587
CLSTN1	Calsyntenin-1	109.7	4.91	1.185	0.968455
UBE2G1	Ubiquitin-conjugating enzyme E2 G1	19.5	5.3	1.185	0.957044
CRK	Adapter molecule crk	33.8	5.55	1.185	0.956496
PSMB10	Proteasome subunit beta type-10	28.9	7.81	1.185	0.956496
PYCR1	Pyrroline-5-carboxylate reductase 1, mitochondrial	33.3	7.61	1.184	0.973587
MAP3K5	Mitogen-activated protein kinase kinase kinase 5	154.4	5.78	1.184	0.973587
SART3	Squamous cell carcinoma antigen recognized by T-cells 3	109.9	5.57	1.184	0.968455
MAGT1	Magnesium transporter protein 1	38	9.63	1.184	0.968455
NUDCD1	NudC domain-containing protein 1	66.7	5.11	1.184	0.957773
BRI3BP	BRI3-binding protein	27.8	9.44	1.183	0.973587
BUD31	Protein BUD31 homolog	17	8.82	1.182	0.973587
SELENOH	Selenoprotein H	13.4	9.74	1.182	0.973587
CNOT1	CCR4-NOT transcription complex subunit 1	266.8	7.11	1.182	0.964919
OPA1	Dynamin-like 120 kDa protein, mitochondrial	111.6	7.87	1.182	0.94158
GPX1	Glutathione peroxidase 1	22.1	6.55	1.181	0.956496
GAR1	H/ACA ribonucleoprotein complex subunit 1	22.3	10.92	1.178	0.973587
NDUFB9	NADH dehydrogenase [ubiquinone] 1 beta subcomplex subunit 9	21.8	8.38	1.177	0.968455
CSTF1	Cleavage stimulation factor subunit 1	48.3	6.58	1.176	0.973587
ILK	Integrin-linked protein kinase	51.4	8.07	1.176	0.953727
AP2S1	AP-2 complex subunit sigma	17	6.18	1.175	0.966531
CPQ	Carboxypeptidase Q	51.9	6.18	1.175	0.957044
RPA1	Replication protein A 70 kDa DNA-binding subunit	68.1	7.21	1.175	0.935098
HDAC2	Histone deacetylase 2	55.3	5.91	1.174	0.974477
FTL	Ferritin light chain	20	5.78	1.174	0.935098
ILKAP	Integrin-linked kinase-associated serine/threonine phosphatase 2C	42.9	7.09	1.173	0.97702
SCYL2	SCY1-like protein 2	103.6	8.22	1.173	0.97618
FUBP3	Far upstream element-binding protein 3	61.6	8.38	1.173	0.972438
PRPF6	Pre-mRNA-processing factor 6	106.9	8.25	1.173	0.935098
DPAGT1	UDP-N-acetylglucosamine--dolichyl-phosphate N-acetylglucosaminephosphotransferase	46.1	8	1.172	0.968455
GLO1	Lactoylglutathione lyase	20.8	5.31	1.172	0.935098
U2AF2	Splicing factor U2AF 65 kDa subunit	53.5	9.09	1.171	0.967724
CNOT10	CCR4-NOT transcription complex subunit 10	82.3	7.78	1.17	0.97702
PSMF1	Proteasome inhibitor PI31 subunit	29.8	5.74	1.17	0.970807
COX4I1	Cytochrome c oxidase subunit 4 isoform 1, mitochondrial	19.6	9.51	1.17	0.935098
FAM91A1	Protein FAM91A1	93.9	6.39	1.169	0.974477
TRIM21	E3 ubiquitin-protein ligase TRIM21	54.1	6.38	1.169	0.97432
KLK7	Kallikrein-7	27.5	8.47	1.169	0.974022
SMC1A	Structural maintenance of chromosomes protein 1A	143.1	7.64	1.169	0.973587
SF3B3	Splicing factor 3B subunit 3	135.5	5.26	1.169	0.944163
NME2	Nucleoside diphosphate kinase B	17.3	8.41	1.169	0.935407
ACOX3	Peroxisomal acyl-coenzyme A oxidase 3	77.6	7.25	1.168	0.982927
OGT	UDP-N-acetylglucosamine--peptide N-acetylglucosaminyltransferase 110 kDa subunit	116.9	6.7	1.168	0.97648
TIPRL	TIP41-like protein	31.4	5.91	1.168	0.974477
CKB	Creatine kinase B-type	42.6	5.59	1.168	0.969732
IGF2R	Cation-independent mannose-6-phosphate receptor	274.2	5.94	1.168	0.953727
HCK	Tyrosine-protein kinase HCK	59.6	6.7	1.167	0.977173
NTMT1	N-terminal Xaa-Pro-Lys N-methyltransferase 1	25.4	5.52	1.167	0.974477
YBX1	Y-box-binding protein 1	35.9	9.88	1.167	0.937344
NUP107	Nuclear pore complex protein Nup107	106.3	5.43	1.166	0.982927
GTF2A2	Transcription initiation factor IIA subunit 2	12.4	6.62	1.166	0.97702
MRPL1	39S ribosomal protein L1, mitochondrial	36.9	8.78	1.166	0.974477
NAGLU	Alpha-N-acetylglucosaminidase	82.2	6.65	1.166	0.974477
CES2	Cocaine esterase	61.8	6.1	1.166	0.973587
WDR82	WD repeat-containing protein 82	35.1	7.69	1.166	0.956289
TP63	Tumor protein 63	76.7	6.57	1.165	0.974477
DCTN5	Dynactin subunit 5	20.1	8.02	1.164	0.977507
ETHE1	Persulfide dioxygenase ETHE1, mitochondrial	27.9	6.83	1.164	0.956496
CTNNB1	Catenin beta-1	85.4	5.86	1.164	0.939144
HADHA	Trifunctional enzyme subunit alpha, mitochondrial	82.9	9.04	1.164	0.939045
PRRC2C	Protein PRRC2C	316.7	9.13	1.163	0.980676
BRIX1	Ribosome biogenesis protein BRX1 homolog	41.4	9.92	1.163	0.973587
FUS	RNA-binding protein FUS	53.4	9.36	1.163	0.970655
DHRS7	Dehydrogenase/reductase SDR family member 7	38.3	8.32	1.163	0.947875
CLPX	ATP-dependent Clp protease ATP-binding subunit clpX-like, mitochondrial	69.2	7.58	1.162	0.980839
CCDC93	Coiled-coil domain-containing protein 93	73.2	8.15	1.162	0.977542
TRMT10C	tRNA methyltransferase 10 homolog C	47.3	9.36	1.162	0.977542
MYL9	Myosin regulatory light polypeptide 9	19.8	4.92	1.161	0.977542
RBM4	RNA-binding protein 4	40.3	7.08	1.161	0.973587
SUPV3L1	ATP-dependent RNA helicase SUPV3L1, mitochondrial	87.9	7.99	1.161	0.973587
UFL1	E3 UFM1-protein ligase 1	89.5	6.79	1.161	0.968455
SNRPD3	Small nuclear ribonucleoprotein Sm D3	13.9	10.32	1.161	0.939562
VPS26B	Vacuolar protein sorting-associated protein 26B	39.1	7.36	1.16	0.973587
SQOR	Sulfide:quinone oxidoreductase, mitochondrial	49.9	9.11	1.16	0.940652
PADI2	Protein-arginine deiminase type-2	75.5	5.59	1.159	0.974477
DDX21	Nucleolar RNA helicase 2	87.3	9.28	1.158	0.974477
TOP1	DNA topoisomerase 1	90.7	9.31	1.158	0.974477
SEC24D	Protein transport protein Sec24D	112.9	7.25	1.158	0.974022
NUP205	Nuclear pore complex protein Nup205	227.8	6.19	1.158	0.973587
NQO2	Ribosyldihydronicotinamide dehydrogenase [quinone]	25.9	6.29	1.157	0.974477
SPTAN1	Spectrin alpha chain, non-erythrocytic 1	284.4	5.35	1.157	0.973587
SLC25A3	Phosphate carrier protein, mitochondrial	40.1	9.38	1.157	0.94158
NCK1	Cytoplasmic protein NCK1	42.8	6.47	1.156	0.974477
LMNA	Prelamin-A/C	74.1	7.02	1.156	0.94158
YWHAE	14-3-3 protein epsilon	29.2	4.74	1.156	0.94158
VMA21	Vacuolar ATPase assembly integral membrane protein VMA21	11.3	7.24	1.156	0.94158
XPO6	Exportin-6	128.8	6.35	1.155	0.977542
PTBP3	Polypyrimidine tract-binding protein 3	59.7	9.04	1.155	0.97618
ABCC5	Multidrug resistance-associated protein 5	160.6	8.66	1.155	0.974477
ALDOA	Fructose-bisphosphate aldolase A	39.4	8.09	1.155	0.94158
NRAS	GTPase NRas	21.2	5.17	1.154	0.977542
MESD	LRP chaperone MESD	26.1	7.78	1.154	0.974831
WDR33	pre-mRNA 3' end processing protein WDR33	145.8	9.17	1.153	0.977173
GOLM1	Golgi membrane protein 1	45.3	4.97	1.153	0.97702
ACTA2	Actin, aortic smooth muscle	42	5.39	1.153	0.944163
PPP2R1A	Serine/threonine-protein phosphatase 2A 65 kDa regulatory subunit A alpha isoform	65.3	5.11	1.153	0.943569
PA2G4	Proliferation-associated protein 2G4	43.8	6.55	1.153	0.94284
USP7	Ubiquitin carboxyl-terminal hydrolase 7	128.2	5.55	1.152	0.974477
TMEM167A	Protein kish-A	8.1	8.95	1.152	0.964919
SDHC	Succinate dehydrogenase cytochrome b560 subunit, mitochondrial	18.6	9.69	1.151	0.973587
EMC8	ER membrane protein complex subunit 8	23.8	6.4	1.151	0.973587
NCAPD2	Condensin complex subunit 1	157.1	6.61	1.15	0.984483
PHB2	Prohibitin-2	33.3	9.83	1.15	0.944163
CLUH	Clustered mitochondria protein homolog	146.6	6.13	1.149	0.976317
SNRPA	U1 small nuclear ribonucleoprotein A	31.3	9.83	1.149	0.954468
TRIP10	Cdc42-interacting protein 4	68.3	5.73	1.149	0.944163
PRXL2B	Prostamide/prostaglandin F synthase	21.2	6.67	1.147	0.980676
RAB31	Ras-related protein Rab-31	21.6	7.06	1.147	0.97702
MARS1	Methionine--tRNA ligase, cytoplasmic	101.1	6.16	1.147	0.953867
COLGALT1	Procollagen galactosyltransferase 1	71.6	7.31	1.146	0.956496
G6PD	Glucose-6-phosphate 1-dehydrogenase	59.2	6.84	1.146	0.946153
ERG28	Ergosterol biosynthetic protein 28 homolog	15.9	9.83	1.145	0.973587
DCTN2	Dynactin subunit 2	44.2	5.21	1.144	0.973587
MYOF	Myoferlin	234.6	6.18	1.142	0.947624
MYO1E	Unconventional myosin-Ie	127	8.92	1.141	0.980693
GNAS	Guanine nucleotide-binding protein G(s) subunit alpha isoforms XLas	111	5.03	1.141	0.974477
NDUFA9	NADH dehydrogenase [ubiquinone] 1 alpha subcomplex subunit 9, mitochondrial	42.5	9.8	1.141	0.973587
TF	Serotransferrin	77	7.12	1.141	0.947875
ZC3HAV1L	Zinc finger CCCH-type antiviral protein 1-like	32.9	8.13	1.139	0.985554
LAMA4	Laminin subunit alpha-4	202.4	6.28	1.139	0.982927
POLR2E	DNA-directed RNA polymerases I, II, and III subunit RPABC1	24.5	5.95	1.139	0.982799
NDUFS1	NADH-ubiquinone oxidoreductase 75 kDa subunit, mitochondrial	79.4	6.23	1.139	0.977542
MCM2	DNA replication licensing factor MCM2	101.8	5.52	1.139	0.974477
IFI16	Gamma-interferon-inducible protein 16	88.2	9.28	1.139	0.959186
NUMA1	Nuclear mitotic apparatus protein 1	238.1	5.78	1.138	0.9573
DERL1	Derlin-1	28.8	9.51	1.136	0.968455
RAN	GTP-binding nuclear protein Ran	24.4	7.49	1.136	0.951463
HBG2	Hemoglobin subunit gamma-2	16.1	7.2	1.136	0.951463
LRRC40	Leucine-rich repeat-containing protein 40	68.2	6.43	1.135	0.987066
GGPS1	Geranylgeranyl pyrophosphate synthase	34.8	6.14	1.135	0.980839
CA12	Carbonic anhydrase 12	39.4	7.23	1.134	0.986275
ENDOG	Endonuclease G, mitochondrial	32.6	9.5	1.134	0.982927
SF3B6	Splicing factor 3B subunit 6	14.6	9.38	1.134	0.97702
SAMM50	Sorting and assembly machinery component 50 homolog	51.9	6.9	1.134	0.953735
SNRPA1	U2 small nuclear ribonucleoprotein A'	28.4	8.62	1.133	0.982927
POLR2B	DNA-directed RNA polymerase II subunit RPB2	133.8	6.87	1.133	0.973587
HLA-B	HLA class I histocompatibility antigen, B alpha chain	40.4	5.85	1.133	0.954468
TMEM87B	Transmembrane protein 87B	63.5	7.44	1.132	0.986275
MAN2A1	Alpha-mannosidase 2	131.1	7.58	1.132	0.97702
TUBB	Tubulin beta chain	49.6	4.89	1.131	0.955466
AHSG	Alpha-2-HS-glycoprotein	39.3	5.72	1.13	0.964919
MX1	Interferon-induced GTP-binding protein Mx1	75.5	5.83	1.13	0.956232
ORM1	Alpha-1-acid glycoprotein 1	23.5	5.02	1.13	0.953727
SNTB2	Beta-2-syntrophin	57.9	8.82	1.129	0.98974
GHITM	Growth hormone-inducible transmembrane protein	37.2	9.94	1.129	0.981579
TCP1	T-complex protein 1 subunit alpha	60.3	6.11	1.129	0.956289
CSE1L	Exportin-2	110.3	5.77	1.128	0.956496
NME1	Nucleoside diphosphate kinase A	17.1	6.19	1.128	0.956496
PDLIM4	PDZ and LIM domain protein 4	35.4	7.91	1.128	0.956496
DICER1	Endoribonuclease Dicer	218.5	5.68	1.127	0.98974
TMEM120A	Ion channel TACAN	40.6	8.98	1.127	0.987066
SLC39A7	Zinc transporter SLC39A7	50.1	6.87	1.127	0.977542
HIGD2A	HIG1 domain family member 2A, mitochondrial	11.5	10.2	1.126	0.988478
TBC1D15	TBC1 domain family member 15	79.4	5.67	1.126	0.983175
SERPINA5	Plasma serine protease inhibitor	45.6	9.26	1.126	0.982927
NDUFB6	NADH dehydrogenase [ubiquinone] 1 beta subcomplex subunit 6	15.5	9.63	1.126	0.982927
IKBIP	Inhibitor of nuclear factor kappa-B kinase-interacting protein	39.3	9.17	1.126	0.982498
TMED9	Transmembrane emp24 domain-containing protein 9	27.3	8.02	1.126	0.956496
THADA	Thyroid adenoma-associated protein	219.5	6.06	1.125	0.991047
TIA1	Nucleolysin TIA-1 isoform p40	42.9	7.74	1.125	0.98974
AHSP	Alpha-hemoglobin-stabilizing protein	11.8	5	1.125	0.98974
BIN2	Bridging integrator 2	61.8	5.15	1.125	0.985417
MYO1D	Unconventional myosin-Id	116.1	9.39	1.125	0.982927
CLEC3B	Tetranectin	22.5	5.67	1.125	0.982498
AP2A1	AP-2 complex subunit alpha-1	107.5	7.03	1.125	0.956496
DCUN1D5	DCN1-like protein 5	27.5	5.58	1.124	0.98974
PIP4K2A	Phosphatidylinositol 5-phosphate 4-kinase type-2 alpha	46.2	6.99	1.124	0.984483
GLYR1	Putative oxidoreductase GLYR1	60.5	9.17	1.123	0.98974
FTO	Alpha-ketoglutarate-dependent dioxygenase FTO	58.2	5.22	1.122	0.982927
ELAVL1	ELAV-like protein 1	36.1	9.17	1.122	0.968455
PCYOX1	Prenylcysteine oxidase 1	56.6	6.18	1.122	0.953727
NUP98	Nuclear pore complex protein Nup98-Nup96	197.5	6.4	1.121	0.982927
ECHS1	Enoyl-CoA hydratase, mitochondrial	31.4	8.07	1.121	0.956496
TMEM245	Transmembrane protein 245	97.3	8.91	1.12	0.99037
ITPR3	Inositol 1,4,5-trisphosphate receptor type 3	303.9	6.48	1.12	0.986022
AP2M1	AP-2 complex subunit mu	49.6	9.54	1.12	0.968455
PPP2CA	Serine/threonine-protein phosphatase 2A catalytic subunit alpha isoform	35.6	5.54	1.119	0.982927
PFKM	ATP-dependent 6-phosphofructokinase, muscle type	85.1	7.99	1.119	0.970558
SCFD1	Sec1 family domain-containing protein 1	72.3	6.27	1.118	0.982927
CTSH	Pro-cathepsin H	37.4	8.07	1.118	0.982927
SPCS2	Signal peptidase complex subunit 2	25	8.47	1.118	0.97618
GOT1	Aspartate aminotransferase, cytoplasmic	46.2	7.01	1.118	0.962428
ANKHD1	Ankyrin repeat and KH domain-containing protein 1	269.3	5.73	1.117	0.99037
AFAP1L2	Actin filament-associated protein 1-like 2	91.2	5.31	1.117	0.98974
EFTUD2	116 kDa U5 small nuclear ribonucleoprotein component	109.4	5	1.117	0.986275
CDK9	Cyclin-dependent kinase 9	42.8	8.79	1.116	0.99037
ARFGEF2	Brefeldin A-inhibited guanine nucleotide-exchange protein 2	201.9	6.33	1.116	0.970807
SHOC2	Leucine-rich repeat protein SHOC-2	64.8	8.46	1.115	0.98974
METAP1	Methionine aminopeptidase 1	43.2	7.17	1.115	0.97648
LMNB2	Lamin-B2	69.9	5.59	1.115	0.96255
SEC24B	Protein transport protein Sec24B	137.3	6.67	1.113	0.99037
GBP5	Guanylate-binding protein 5	66.6	5.55	1.113	0.99037
TXNRD2	Thioredoxin reductase 2, mitochondrial	56.5	7.5	1.113	0.99037
PON2	Serum paraoxonase/arylesterase 2	39.4	5.6	1.113	0.99037
BAIAP2L1	Brain-specific angiogenesis inhibitor 1-associated protein 2-like protein 1	56.8	8.68	1.113	0.986275
DHRS7B	Dehydrogenase/reductase SDR family member 7B	35.1	9.55	1.112	0.98974
UQCRQ	Cytochrome b-c1 complex subunit 8	9.9	10.08	1.112	0.982927
NDUFS3	NADH dehydrogenase [ubiquinone] iron-sulfur protein 3, mitochondrial	30.2	7.5	1.111	0.98974
SPCS3	Signal peptidase complex subunit 3	20.3	8.62	1.111	0.96738
HNRNPLL	Heterogeneous nuclear ribonucleoprotein L-like	60	7.72	1.11	0.98974
AGL	Glycogen debranching enzyme	174.7	6.76	1.11	0.982927
ARHGAP35	Rho GTPase-activating protein 35	170.4	6.64	1.109	0.98974
ZFR	Zinc finger RNA-binding protein	116.9	9.04	1.109	0.986275
NAPA	Alpha-soluble NSF attachment protein	33.2	5.36	1.109	0.977173
TAPBP	Tapasin	47.6	7.15	1.109	0.968455
DDT	D-dopachrome decarboxylase	12.7	7.3	1.109	0.968455
PSEN1	Presenilin-1	52.6	5.31	1.108	0.99037
TNPO2	Transportin-2	101.3	5.01	1.107	0.986275
DOCK9	Dedicator of cytokinesis protein 9	236.3	7.49	1.107	0.985417
ACTC1	Actin, alpha cardiac muscle 1	42	5.39	1.107	0.968455
SNRPB	Small nuclear ribonucleoprotein-associated proteins B and B'	24.6	11.19	1.107	0.968455
APOO	MICOS complex subunit MIC26	22.3	9.13	1.106	0.99037
ATRN	Attractin	158.4	7.31	1.106	0.98974
FHL3	Four and a half LIM domains protein 3	31.2	6.2	1.105	0.99037
OPA3	Optic atrophy 3 protein	20	8.91	1.105	0.99037
SNRPB2	U2 small nuclear ribonucleoprotein B''	25.5	9.72	1.105	0.98974
PPP2CB	Serine/threonine-protein phosphatase 2A catalytic subunit beta isoform	35.6	5.43	1.105	0.97212
SEPTIN9	Septin-9	65.4	8.97	1.105	0.969732
PRPF19	Pre-mRNA-processing factor 19	55.1	6.61	1.105	0.966531
TBL2	Transducin beta-like protein 2	49.8	9.44	1.104	0.98974
MRPL13	39S ribosomal protein L13, mitochondrial	20.7	9.16	1.103	0.99037
LUM	Lumican	38.4	6.61	1.103	0.981579
PREB	Prolactin regulatory element-binding protein	45.4	7.88	1.102	0.99037
C4A	Complement C4-A	192.7	7.08	1.101	0.99037
SNRNP40	U5 small nuclear ribonucleoprotein 40 kDa protein	39.3	8.1	1.101	0.99037
CYBC1	Cytochrome b-245 chaperone 1	20.8	6.8	1.101	0.98974
TBK1	Serine/threonine-protein kinase TBK1	83.6	6.79	1.1	0.99037
GTF2I	General transcription factor II-I	112.3	6.39	1.099	0.99037
NDUFV1	NADH dehydrogenase [ubiquinone] flavoprotein 1, mitochondrial	50.8	8.21	1.099	0.982927
NPEPPS	Puromycin-sensitive aminopeptidase	103.2	5.72	1.099	0.973047
USP10	Ubiquitin carboxyl-terminal hydrolase 10	87.1	5.31	1.098	0.98974
RPN1	Dolichyl-diphosphooligosaccharide--protein glycosyltransferase subunit 1	68.5	6.38	1.098	0.973587
PCBP1	Poly(rC)-binding protein 1	37.5	7.09	1.098	0.973587
PLCG1	1-phosphatidylinositol 4,5-bisphosphate phosphodiesterase gamma-1	148.4	6.05	1.097	0.99037
ANKFY1	Rabankyrin-5	128.3	6.1	1.097	0.973587
ARFGEF1	Brefeldin A-inhibited guanine nucleotide-exchange protein 1	208.6	5.85	1.096	0.99037
SMYD4	SET and MYND domain-containing protein 4	89.2	6.83	1.096	0.99037
RNMT	mRNA cap guanine-N7 methyltransferase	54.8	6.61	1.096	0.990119
CAMK2G	Calcium/calmodulin-dependent protein kinase type II subunit gamma	62.6	7.83	1.094	0.99037
IGLV3-19	Immunoglobulin lambda variable 3-19	12	4.96	1.094	0.99037
CTSS	Cathepsin S	37.5	8.34	1.094	0.98974
DDOST	Dolichyl-diphosphooligosaccharide--protein glycosyltransferase 48 kDa subunit	50.8	6.55	1.094	0.973587
FAM210A	Protein FAM210A	30.8	9.76	1.093	0.99037
SLIRP	SRA stem-loop-interacting RNA-binding protein, mitochondrial	12.3	10.24	1.092	0.99037
DDX23	Probable ATP-dependent RNA helicase DDX23	95.5	9.55	1.092	0.99037
RALY	RNA-binding protein Raly	32.4	9.17	1.092	0.98974
SRC	Proto-oncogene tyrosine-protein kinase Src	59.8	7.42	1.091	0.98974
MCAM	Cell surface glycoprotein MUC18	71.6	5.76	1.09	0.99037
HEATR3	HEAT repeat-containing protein 3	74.5	5.11	1.09	0.99037
CBR1	Carbonyl reductase [NADPH] 1	30.4	8.32	1.09	0.973587
CACYBP	Calcyclin-binding protein	26.2	8.25	1.089	0.98974
MPST	3-mercaptopyruvate sulfurtransferase	33.2	6.6	1.089	0.973587
SNX17	Sorting nexin-17	52.9	7.46	1.087	0.99037
HNRNPF	Heterogeneous nuclear ribonucleoprotein F	45.6	5.58	1.087	0.982927
AK3	GTP:AMP phosphotransferase AK3, mitochondrial	25.6	9.16	1.086	0.99037
EMD	Emerin	29	5.5	1.086	0.99037
XPNPEP1	Xaa-Pro aminopeptidase 1	69.9	5.67	1.086	0.98974
GOPC	Golgi-associated PDZ and coiled-coil motif-containing protein	50.5	5.92	1.085	0.99037
NUP153	Nuclear pore complex protein Nup153	153.8	8.73	1.085	0.99037
FAP	Prolyl endopeptidase FAP	87.7	6.65	1.084	0.99037
PPP2R5D	Serine/threonine-protein phosphatase 2A 56 kDa regulatory subunit delta isoform	69.9	8.13	1.084	0.99037
PDIA6	Protein disulfide-isomerase A6	48.1	5.08	1.084	0.974477
NNMT	Nicotinamide N-methyltransferase	29.6	5.74	1.084	0.974477
NLE1	Notchless protein homolog 1	53.3	7.34	1.083	0.99037
NUCB2	Nucleobindin-2	50.2	5.12	1.083	0.99037
CPT1A	Carnitine O-palmitoyltransferase 1, liver isoform	88.3	8.65	1.083	0.98974
RBMXL1	RNA binding motif protein, X-linked-like-1	42.1	9.89	1.083	0.981579
SURF4	Surfeit locus protein 4	30.4	7.78	1.083	0.979227
PTK2	Focal adhesion kinase 1	119.2	6.62	1.082	0.99037
ESYT1	Extended synaptotagmin-1	122.8	5.83	1.081	0.976353
CMBL	Carboxymethylenebutenolidase homolog	28	7.18	1.08	0.99226
NDUFA7	NADH dehydrogenase [ubiquinone] 1 alpha subcomplex subunit 7	12.5	10.18	1.079	0.99037
ARL8A	ADP-ribosylation factor-like protein 8A	21.4	7.77	1.078	0.99037
HEBP1	Heme-binding protein 1	21.1	5.8	1.078	0.99037
SHTN1	Shootin-1	71.6	5.33	1.078	0.99037
SPART	Spartin	72.8	5.91	1.078	0.99037
MPC2	Mitochondrial pyruvate carrier 2	14.3	10.43	1.078	0.99037
ARHGEF17	Rho guanine nucleotide exchange factor 17	221.5	6.29	1.078	0.99037
MRPL2	39S ribosomal protein L2, mitochondrial	33.3	11.3	1.077	0.99226
FXYD3	FXYD domain-containing ion transport regulator 3	9.3	7.3	1.077	0.987066
EIF2B1	Translation initiation factor eIF-2B subunit alpha	33.7	7.33	1.076	0.99037
LYN	Tyrosine-protein kinase Lyn	58.5	7.11	1.076	0.99037
CCT8	T-complex protein 1 subunit theta	59.6	5.6	1.076	0.977507
PHB1	Prohibitin	29.8	5.76	1.076	0.977507
RTN1	Reticulon-1	83.6	4.69	1.075	0.991304
NEMF	Nuclear export mediator factor NEMF	122.9	6.35	1.075	0.99037
HOMER3	Homer protein homolog 3	39.8	5.45	1.075	0.99037
BICD2	Protein bicaudal D homolog 2	93.5	5.44	1.075	0.98974
CNRIP1	CB1 cannabinoid receptor-interacting protein 1	18.6	7.94	1.074	0.99226
DYNC1LI1	Cytoplasmic dynein 1 light intermediate chain 1	56.5	6.42	1.074	0.99037
AHSA1	Activator of 90 kDa heat shock protein ATPase homolog 1	38.3	5.53	1.074	0.977542
MT-ND5	NADH-ubiquinone oxidoreductase chain 5	67	9.03	1.073	0.99226
PPIC	Peptidyl-prolyl cis-trans isomerase C	22.7	8.4	1.073	0.990889
SPTBN1	Spectrin beta chain, non-erythrocytic 1	274.4	5.57	1.073	0.99037
PUF60	Poly(U)-binding-splicing factor PUF60	59.8	5.29	1.072	0.99037
CUL4B	Cullin-4B	103.9	7.37	1.072	0.99037
PPP1CC	Serine/threonine-protein phosphatase PP1-gamma catalytic subunit	37	6.54	1.071	0.992056
CISD2	CDGSH iron-sulfur domain-containing protein 2	15.3	9.61	1.071	0.991049
FAH	Fumarylacetoacetase	46.3	6.95	1.071	0.99037
DOCK11	Dedicator of cytokinesis protein 11	237.5	7.74	1.07	0.99037
PAM16	Mitochondrial import inner membrane translocase subunit TIM16	13.8	9.7	1.069	0.99226
SLC35A4	SLC35A4 upstream open reading frame protein	11.1	8.1	1.069	0.99037
SPNS1	Protein spinster homolog 1	56.6	6.64	1.069	0.99037
ITGB2	Integrin beta-2	84.7	6.95	1.069	0.981579
FAM83F	Protein FAM83F	55.5	8.19	1.068	0.99037
MAT2A	S-adenosylmethionine synthase isoform type-2	43.6	6.48	1.068	0.982927
DOCK7	Dedicator of cytokinesis protein 7	242.4	6.8	1.067	0.992247
PRPSAP1	Phosphoribosyl pyrophosphate synthase-associated protein 1	39.4	7.2	1.067	0.99037
TNS3	Tensin-3	155.2	6.81	1.067	0.99037
GSDMA	Gasdermin-A	49.3	5.29	1.066	0.99226
PALLD	Palladin	150.5	7.09	1.066	0.982498
MIA2	Melanoma inhibitory activity protein 2	159.7	4.69	1.065	0.99226
PACSIN3	Protein kinase C and casein kinase substrate in neurons protein 3	48.5	6.18	1.065	0.99226
CDC5L	Cell division cycle 5-like protein	92.2	8.18	1.065	0.991049
MYH8	Myosin-8	222.6	5.74	1.065	0.99037
MRPL37	39S ribosomal protein L37, mitochondrial	48.1	8.59	1.064	0.990893
DDX6	Probable ATP-dependent RNA helicase DDX6	54.4	8.66	1.064	0.987064
VPS53	Vacuolar protein sorting-associated protein 53 homolog	94.3	6.7	1.063	0.99037
PSMB8	Proteasome subunit beta type-8	30.3	7.43	1.063	0.982927
EIF4A1	Eukaryotic initiation factor 4A-I	46.1	5.48	1.062	0.982927
PRPF4	U4/U6 small nuclear ribonucleoprotein Prp4	58.4	7.42	1.061	0.99037
SLC16A3	Monocarboxylate transporter 4	49.4	7.96	1.061	0.99037
PRTN3	Myeloblastin	27.8	8.35	1.061	0.982927
SNRPD2	Small nuclear ribonucleoprotein Sm D2	13.5	9.91	1.061	0.982927
THOC3	THO complex subunit 3	38.7	6.09	1.06	0.992056
HSD17B12	Very-long-chain 3-oxoacyl-CoA reductase	34.3	9.32	1.06	0.99037
TAP1	Antigen peptide transporter 1	87.2	8.02	1.06	0.987064
TXNDC17	Thioredoxin domain-containing protein 17	13.9	5.52	1.06	0.982927
NDUFC2	NADH dehydrogenase [ubiquinone] 1 subunit C2	14.2	8.98	1.059	0.99037
MMS19	MMS19 nucleotide excision repair protein homolog	113.2	6.35	1.058	0.99226
PDP1	[Pyruvate dehydrogenase [acetyl-transferring]]-phosphatase 1, mitochondrial	61	6.67	1.058	0.99226
CPSF1	Cleavage and polyadenylation specificity factor subunit 1	160.8	6.4	1.058	0.99226
NDUFA8	NADH dehydrogenase [ubiquinone] 1 alpha subcomplex subunit 8	20.1	7.65	1.057	0.99226
RALGAPB	Ral GTPase-activating protein subunit beta	166.7	6.79	1.057	0.99226
ALG12	Dol-P-Man:Man(7)GlcNAc(2)-PP-Dol alpha-1,6-mannosyltransferase	54.6	9.58	1.057	0.992236
PTBP1	Polypyrimidine tract-binding protein 1	57.2	9.17	1.057	0.98417
YY1	Transcriptional repressor protein YY1	44.7	6.25	1.056	0.99226
NDUFB3	NADH dehydrogenase [ubiquinone] 1 beta subcomplex subunit 3	11.4	9.2	1.056	0.99037
NDUFA2	NADH dehydrogenase [ubiquinone] 1 alpha subcomplex subunit 2	10.9	9.57	1.055	0.99226
CRNKL1	Crooked neck-like protein 1	100.4	8	1.055	0.992056
CSNK1G3	Casein kinase I isoform gamma-3	51.4	9.22	1.055	0.99037
XRCC5	X-ray repair cross-complementing protein 5	82.7	5.81	1.055	0.985417
VCPIP1	Deubiquitinating protein VCPIP1	134.2	7.2	1.054	0.99226
RAB32	Ras-related protein Rab-32	25	6.54	1.054	0.99226
SERPINA7	Thyroxine-binding globulin	46.3	6.3	1.054	0.992056
TMEM109	Transmembrane protein 109	26.2	10.48	1.054	0.98974
TXN	Thioredoxin	11.7	4.92	1.054	0.985417
CUL1	Cullin-1	89.6	8	1.053	0.99226
TRMT61A	tRNA (adenine(58)-N(1))-methyltransferase catalytic subunit TRMT61A	31.4	7.36	1.053	0.99226
SUPT6H	Transcription elongation factor SPT6	198.9	4.91	1.052	0.99226
HECTD1	E3 ubiquitin-protein ligase HECTD1	289.2	5.35	1.052	0.99226
ENOPH1	Enolase-phosphatase E1	28.9	4.78	1.052	0.992247
LPP	Lipoma-preferred partner	65.7	7.37	1.051	0.99226
ATXN10	Ataxin-10	53.5	5.25	1.051	0.99226
PSME3	Proteasome activator complex subunit 3	29.5	5.95	1.051	0.992056
NEK9	Serine/threonine-protein kinase Nek9	107.1	5.74	1.051	0.990893
PAICS	Multifunctional protein ADE2	47	7.23	1.051	0.986275
RAD50	DNA repair protein RAD50	153.8	6.89	1.05	0.99226
SMARCC2	SWI/SNF complex subunit SMARCC2	132.8	5.69	1.05	0.99226
UBLCP1	Ubiquitin-like domain-containing CTD phosphatase 1	36.8	6.46	1.05	0.99226
CDH1	Cadherin-1	97.4	4.73	1.05	0.991217
PERP	p53 apoptosis effector related to PMP-22	21.4	7.03	1.05	0.990893
OSTC	Oligosaccharyltransferase complex subunit OSTC	16.8	9.13	1.05	0.99037
FN1	Fibronectin	272.2	5.5	1.05	0.986275
CYC1	Cytochrome c1, heme protein, mitochondrial	35.4	9	1.048	0.985417
CDS2	Phosphatidate cytidylyltransferase 2	51.4	7.09	1.047	0.99226
OSBPL8	Oxysterol-binding protein-related protein 8	101.1	6.96	1.047	0.99226
IGHG4	Immunoglobulin heavy constant gamma 4	35.9	7.36	1.047	0.988214
CSPG4	Chondroitin sulfate proteoglycan 4	250.4	5.47	1.046	0.99226
SCARB2	Lysosome membrane protein 2	54.3	5.14	1.046	0.99226
NUB1	NEDD8 ultimate buster 1	70.5	5.96	1.046	0.99226
DYM	Dymeclin	75.9	5.86	1.046	0.99226
CNBP	Cellular nucleic acid-binding protein	19.5	7.71	1.046	0.99037
SSR3	Translocon-associated protein subunit gamma	21.1	9.61	1.046	0.99037
TPR	Nucleoprotein TPR	267.1	5.02	1.045	0.99226
GOLGB1	Golgin subfamily B member 1	375.8	5	1.045	0.99226
STON2	Stonin-2	101.1	5.39	1.045	0.99226
NDUFAF4	NADH dehydrogenase [ubiquinone] 1 alpha subcomplex assembly factor 4	20.3	8.82	1.045	0.99226
COMT	Catechol O-methyltransferase	30	5.47	1.045	0.99037
CTNNBL1	Beta-catenin-like protein 1	65.1	5.05	1.044	0.99226
RTCB	RNA-splicing ligase RtcB homolog	55.2	7.23	1.044	0.99037
UFD1	Ubiquitin recognition factor in ER-associated degradation protein 1	34.5	6.7	1.043	0.99226
SNRPD1	Small nuclear ribonucleoprotein Sm D1	13.3	11.56	1.043	0.99037
MTX1	Metaxin-1	51.4	9.79	1.043	0.98974
ROCK2	Rho-associated protein kinase 2	160.8	6.02	1.042	0.99226
MTA2	Metastasis-associated protein MTA2	75	9.66	1.042	0.99226
MED23	Mediator of RNA polymerase II transcription subunit 23	156.4	7.4	1.042	0.99226
KRR1	KRR1 small subunit processome component homolog	43.6	9.77	1.042	0.99226
PAFAH1B1	Platelet-activating factor acetylhydrolase IB subunit beta	46.6	7.37	1.042	0.99037
PARP14	Protein mono-ADP-ribosyltransferase PARP14	202.7	7.18	1.041	0.99226
POP1	Ribonucleases P/MRP protein subunit POP1	114.6	9.22	1.041	0.99226
LTF	Lactotransferrin	78.1	8.12	1.04	0.98974
GBP1	Guanylate-binding protein 1	67.9	6.32	1.04	0.98974
VAC14	Protein VAC14 homolog	87.9	6.13	1.039	0.993072
RANBP2	E3 SUMO-protein ligase RanBP2	358	6.2	1.039	0.99226
ATP2B1	Plasma membrane calcium-transporting ATPase 1	134.6	5.91	1.039	0.99226
FLAD1	FAD synthase	65.2	6.93	1.039	0.99226
ACTN3	Alpha-actinin-3	103.2	5.52	1.039	0.99037
CBR3	Carbonyl reductase [NADPH] 3	30.8	6.18	1.038	0.99226
NOP9	Nucleolar protein 9	69.4	7.28	1.038	0.99226
MBOAT2	Lysophospholipid acyltransferase 2	59.5	8.03	1.037	0.99226
DYNC1H1	Cytoplasmic dynein 1 heavy chain 1	532.1	6.4	1.037	0.99037
HSPA5	Endoplasmic reticulum chaperone BiP	72.3	5.16	1.037	0.99037
ENO2	Gamma-enolase	47.2	5.03	1.036	0.99226
EMC2	ER membrane protein complex subunit 2	34.8	6.57	1.036	0.99226
CUL5	Cullin-5	90.9	7.94	1.036	0.99226
TATDN1	Putative deoxyribonuclease TATDN1	33.6	6.96	1.036	0.99226
CEP290	Centrosomal protein of 290 kDa	290.2	5.95	1.036	0.99226
STT3A	Dolichyl-diphosphooligosaccharide--protein glycosyltransferase subunit STT3A	80.5	8.07	1.036	0.99037
PRPS1	Ribose-phosphate pyrophosphokinase 1	34.8	6.98	1.036	0.99037
ACP2	Lysosomal acid phosphatase	48.3	6.74	1.035	0.992812
ME1	NADP-dependent malic enzyme	64.1	6.13	1.035	0.99226
MRPL49	39S ribosomal protein L49, mitochondrial	19.2	9.45	1.035	0.99226
PDIA4	Protein disulfide-isomerase A4	72.9	5.07	1.035	0.99037
LDHB	L-lactate dehydrogenase B chain	36.6	6.05	1.035	0.99037
GOLGA3	Golgin subfamily A member 3	167.3	5.44	1.034	0.99226
CPSF3	Cleavage and polyadenylation specificity factor subunit 3	77.4	5.6	1.033	0.993072
NCLN	Nicalin	62.9	6.89	1.033	0.99226
NDUFS7	NADH dehydrogenase [ubiquinone] iron-sulfur protein 7, mitochondrial	23.5	9.99	1.033	0.99226
GEMIN5	Gem-associated protein 5	168.5	6.62	1.033	0.99226
DDX1	ATP-dependent RNA helicase DDX1	82.4	7.23	1.033	0.99037
G3BP1	Ras GTPase-activating protein-binding protein 1	52.1	5.52	1.033	0.99037
STX7	Syntaxin-7	29.8	5.55	1.03	0.992242
TMX3	Protein disulfide-isomerase TMX3	51.8	4.91	1.032	0.993072
GRM1	Metabotropic glutamate receptor 1	132.3	6.7	1.032	0.993072
MOB4	MOB-like protein phocein	26	5.78	1.032	0.99226
NHLRC2	NHL repeat-containing protein 2	79.4	5.55	1.032	0.99226
RFC5	Replication factor C subunit 5	38.5	7.2	1.032	0.99226
GPN1	GPN-loop GTPase 1	41.7	4.92	1.032	0.99226
STRN	Striatin	86.1	5.27	1.032	0.99226
MT-ND2	NADH-ubiquinone oxidoreductase chain 2	38.9	9.83	1.032	0.99226
STX4	Syntaxin-4	34.2	6.28	1.031	0.99226
AARS2	Alanine--tRNA ligase, mitochondrial	107.3	6.27	1.03	0.99226
SMARCA4	Transcription activator BRG1	184.5	7.88	1.029	0.993072
NDUFA10	NADH dehydrogenase [ubiquinone] 1 alpha subcomplex subunit 10, mitochondrial	40.7	8.48	1.029	0.992812
TMED2	Transmembrane emp24 domain-containing protein 2	22.7	5.17	1.029	0.992056
STT3B	Dolichyl-diphosphooligosaccharide--protein glycosyltransferase subunit STT3B	93.6	8.91	1.028	0.99226
CASP8	Caspase-8	55.4	5.1	1.028	0.99226
SKIC3	Tetratricopeptide repeat protein 37	175.4	7.53	1.027	0.993072
RSL1D1	Ribosomal L1 domain-containing protein 1	54.9	10.13	1.027	0.993072
SLC12A9	Solute carrier family 12 member 9	96	8.07	1.027	0.99226
RBBP9	Serine hydrolase RBBP9	21	6.2	1.027	0.99226
PGLYRP2	N-acetylmuramoyl-L-alanine amidase	62.2	7.55	1.026	0.993072
CHMP1B	Charged multivesicular body protein 1b	22.1	8.1	1.026	0.993072
NOP56	Nucleolar protein 56	66	9.19	1.026	0.99226
RUFY1	RUN and FYVE domain-containing protein 1	79.8	5.74	1.026	0.99226
BTAF1	TATA-binding protein-associated factor 172	206.8	6.52	1.026	0.99226
LGALS3	Galectin-3	26.1	8.56	1.026	0.99037
TIAL1	Nucleolysin TIAR	41.6	7.74	1.026	0.99037
ATE1	Arginyl-tRNA--protein transferase 1	59.1	7.93	1.025	0.993072
SLC15A4	Solute carrier family 15 member 4	62	9	1.025	0.99226
NUP214	Nuclear pore complex protein Nup214	213.5	7.47	1.024	0.993072
PON1	Serum paraoxonase/arylesterase 1	39.7	5.22	1.024	0.99226
CCT3	T-complex protein 1 subunit gamma	60.5	6.49	1.024	0.99037
HEXB	Beta-hexosaminidase subunit beta	63.1	6.76	1.024	0.99037
BAIAP2	Brain-specific angiogenesis inhibitor 1-associated protein 2	60.8	8.9	1.024	0.99037
DAD1	Dolichyl-diphosphooligosaccharide--protein glycosyltransferase subunit DAD1	12.5	7.08	1.024	0.99037
CARM1	Histone-arginine methyltransferase CARM1	65.8	6.73	1.023	0.993072
GDI1	Rab GDP dissociation inhibitor alpha	50.6	5.14	1.023	0.99037
GBE1	1,4-alpha-glucan-branching enzyme	80.4	6.32	1.022	0.993072
PPP1CB	Serine/threonine-protein phosphatase PP1-beta catalytic subunit	37.2	6.19	1.022	0.99226
EXOC2	Exocyst complex component 2	104	6.9	1.021	0.99226
SYVN1	E3 ubiquitin-protein ligase synoviolin	67.6	6.95	1.02	0.993523
AP2A2	AP-2 complex subunit alpha-2	103.9	6.96	1.02	0.993072
HNRNPA2B1	Heterogeneous nuclear ribonucleoproteins A2/B1	37.4	8.95	1.02	0.99037
ANXA7	Annexin A7	52.7	5.68	1.019	0.992056
GALK1	Galactokinase	42.2	6.46	1.018	0.996885
RIDA	2-iminobutanoate/2-iminopropanoate deaminase	14.5	8.68	1.018	0.996885
HADH	Hydroxyacyl-coenzyme A dehydrogenase, mitochondrial	34.3	8.85	1.018	0.993072
SDHD	Succinate dehydrogenase [ubiquinone] cytochrome b small subunit, mitochondrial	17	8.63	1.017	0.993523
QKI	Protein quaking	37.6	8.56	1.017	0.99226
XRCC6	X-ray repair cross-complementing protein 6	69.8	6.64	1.017	0.99037
PRKCSH	Glucosidase 2 subunit beta	59.4	4.41	1.017	0.99037
UBA6	Ubiquitin-like modifier-activating enzyme 6	117.9	6.14	1.016	0.992056
ACOT9	Acyl-coenzyme A thioesterase 9, mitochondrial	49.9	8.6	1.016	0.99037
SKIC2	Helicase SKI2W	137.7	6.06	1.015	0.995067
NDUFA13	NADH dehydrogenase [ubiquinone] 1 alpha subcomplex subunit 13	16.7	8.43	1.015	0.992615
ACSS2	Acetyl-coenzyme A synthetase, cytoplasmic	78.5	6.46	1.015	0.992615
NOMO2	Nodal modulator 2	139.4	5.76	1.015	0.99037
PUM1	Pumilio homolog 1	126.4	6.84	1.014	0.993072
TAP2	Antigen peptide transporter 2	75.6	8.02	1.014	0.99226
PRDX3	Thioredoxin-dependent peroxide reductase, mitochondrial	27.7	7.78	1.014	0.99037
RAD23B	UV excision repair protein RAD23 homolog B	43.1	4.84	1.014	0.99037
UBE2N	Ubiquitin-conjugating enzyme E2 N	17.1	6.57	1.014	0.99037
ZZEF1	Zinc finger ZZ-type and EF-hand domain-containing protein 1	330.9	5.95	1.013	0.99226
MSMO1	Methylsterol monooxygenase 1	35.2	7.23	1.012	0.994038
GALNT3	Polypeptide N-acetylgalactosaminyltransferase 3	72.6	7.99	1.012	0.993072
PTDSS1	Phosphatidylserine synthase 1	55.5	8.43	1.012	0.993072
TUT7	Terminal uridylyltransferase 7	171.1	6.83	1.012	0.993072
NDUFB4	NADH dehydrogenase [ubiquinone] 1 beta subcomplex subunit 4	15.2	9.85	1.012	0.993072
ARMC1	Armadillo repeat-containing protein 1	31.3	5.74	1.012	0.992631
SNX1	Sorting nexin-1	59	5.15	1.011	0.993072
H2AZ2	Histone H2A.V	13.5	10.58	1.011	0.99226
THEM6	Protein THEM6	23.9	9.55	1.01	0.993072
EHHADH	Peroxisomal bifunctional enzyme	79.4	9.14	1.01	0.993072
CASP7	Caspase-7	34.3	6.07	1.009	0.995966
PRPF38A	Pre-mRNA-splicing factor 38A	37.5	9.96	1.007	0.995067
NDUFA11	NADH dehydrogenase [ubiquinone] 1 alpha subcomplex subunit 11	14.8	8.72	1.007	0.993523
ANO6	Anoctamin-6	106.1	7.77	1.006	0.996885
DCPS	m7GpppX diphosphatase	38.6	6.38	1.006	0.993072
EIF4G2	Eukaryotic translation initiation factor 4 gamma 2	102.3	7.14	1.006	0.99226
CPT2	Carnitine O-palmitoyltransferase 2, mitochondrial	73.7	8.18	1.005	0.993523
NDUFB10	NADH dehydrogenase [ubiquinone] 1 beta subcomplex subunit 10	20.8	8.48	1.005	0.993072
TBXAS1	Thromboxane-A synthase	60.5	7.62	1.005	0.993072
PFKL	ATP-dependent 6-phosphofructokinase, liver type	85	7.5	1.005	0.990889
NMT1	Glycylpeptide N-tetradecanoyltransferase 1	56.8	7.8	1.004	0.995867
ALG3	Dol-P-Man:Man(5)GlcNAc(2)-PP-Dol alpha-1,3-mannosyltransferase	50.1	9.44	1.004	0.993523
GFM1	Elongation factor G, mitochondrial	83.4	7.01	1.004	0.993072
HS2ST1	Heparan sulfate 2-O-sulfotransferase 1	41.9	8.69	1.004	0.993072
TMEM43	Transmembrane protein 43	44.8	8.13	1.003	0.993072
MCEMP1	Mast cell-expressed membrane protein 1	21.2	8.87	1.003	0.993072
RBP1	Retinol-binding protein 1	15.8	5.11	1.003	0.99226
CYB5R3	NADH-cytochrome b5 reductase 3	34.2	7.59	1.003	0.99226
CCDC47	PAT complex subunit CCDC47	55.8	4.87	1.003	0.99226
SKIC8	WD repeat-containing protein 61	33.6	5.47	1.003	0.992236
KIF13A	Kinesin-like protein KIF13A	202.2	5.6	1.002	0.994038
CCT5	T-complex protein 1 subunit epsilon	59.6	5.66	1.002	0.99226
HSP90AB2P	Putative heat shock protein HSP 90-beta 2	44.3	4.84	1.002	0.99226
ELMOD2	ELMO domain-containing protein 2	34.9	8.05	1.001	0.995669
PWP1	Periodic tryptophan protein 1 homolog	55.8	4.77	1.001	0.995278
TSNAX	Translin-associated protein X	33.1	6.55	1.001	0.993072
SLC44A2	Choline transporter-like protein 2	80.1	8.57	1	0.996885
BDH2	3-hydroxybutyrate dehydrogenase type 2	26.7	7.65	1	0.995867
DCTN6	Dynactin subunit 6	20.7	6.32	1	0.995669
EXOC4	Exocyst complex component 4	110.4	6.49	0.999	0.996885
DAZAP1	DAZ-associated protein 1	43.4	8.56	0.999	0.995067
INPP5K	Inositol polyphosphate 5-phosphatase K	51.1	6.54	0.999	0.994038
UFSP2	Ufm1-specific protease 2	53.2	7.01	0.999	0.993072
CTSZ	Cathepsin Z	33.8	7.11	0.999	0.993072
NDUFA5	NADH dehydrogenase [ubiquinone] 1 alpha subcomplex subunit 5	13.5	5.99	0.998	0.993072
ANXA5	Annexin A5	35.9	5.05	0.998	0.99226
TMED10	Transmembrane emp24 domain-containing protein 10	25	7.44	0.998	0.99226
PARP1	Poly [ADP-ribose] polymerase 1	113	8.88	0.997	0.996885
EPS15	Epidermal growth factor receptor substrate 15	98.6	4.64	0.997	0.993072
LYZ	Lysozyme C	16.5	9.16	0.997	0.99226
DNAJB11	DnaJ homolog subfamily B member 11	40.5	6.18	0.996	0.996885
NDUFA12	NADH dehydrogenase [ubiquinone] 1 alpha subcomplex subunit 12	17.1	9.63	0.996	0.996885
GOLGA2	Golgin subfamily A member 2	113	5.02	0.995	0.999017
SGSH	N-sulphoglucosamine sulphohydrolase	56.7	6.95	0.995	0.996885
P3H2	Prolyl 3-hydroxylase 2	80.9	5.71	0.995	0.995867
ANKRD17	Ankyrin repeat domain-containing protein 17	274.1	6.52	0.995	0.993523
FUCA2	Plasma alpha-L-fucosidase	54	6.25	0.995	0.993523
ANXA3	Annexin A3	36.4	5.92	0.995	0.99226
CPPED1	Serine/threonine-protein phosphatase CPPED1	35.5	6.2	0.995	0.99226
SNRNP70	U1 small nuclear ribonucleoprotein 70 kDa	51.5	9.94	0.995	0.99226
CAMLG	Guided entry of tail-anchored proteins factor CAMLG	32.9	8.05	0.994	0.993523
SEC11A	Signal peptidase complex catalytic subunit SEC11A	20.6	9.48	0.994	0.993072
ARF5	ADP-ribosylation factor 5	20.5	6.79	0.994	0.99226
NDUFB5	NADH dehydrogenase [ubiquinone] 1 beta subcomplex subunit 5, mitochondrial	21.7	9.63	0.993	0.999017
PRCP	Lysosomal Pro-X carboxypeptidase	55.8	7.21	0.993	0.995867
VPS11	Vacuolar protein sorting-associated protein 11 homolog	107.8	7.05	0.993	0.995067
MAU2	MAU2 chromatid cohesion factor homolog	69	7.25	0.993	0.994957
BLVRA	Biliverdin reductase A	33.4	6.44	0.993	0.99226
RABL6	Rab-like protein 6	79.5	5.22	0.992	0.998068
HRAS	GTPase HRas	21.3	5.31	0.992	0.996885
ACTR10	Actin-related protein 10	46.3	7.37	0.992	0.995966
PCBP2	Poly(rC)-binding protein 2	38.6	6.79	0.992	0.99226
IGF1R	Insulin-like growth factor 1 receptor	154.7	5.8	0.991	0.999017
TLN2	Talin-2	271.4	5.57	0.991	0.995966
KDM5A	Lysine-specific demethylase 5A	192	6.49	0.991	0.995348
PYGL	Glycogen phosphorylase, liver form	97.1	7.17	0.991	0.99226
CAMK2D	Calcium/calmodulin-dependent protein kinase type II subunit delta	56.3	7.25	0.99	0.999017
PLBD1	Phospholipase B-like 1	63.2	9.06	0.99	0.998068
UNC45A	Protein unc-45 homolog A	103	6.07	0.99	0.995273
KPNA1	Importin subunit alpha-5	60.2	5.01	0.99	0.995067
NOL6	Nucleolar protein 6	127.5	7.64	0.99	0.994064
NUDT21	Cleavage and polyadenylation specificity factor subunit 5	26.2	8.82	0.99	0.99226
CD209	CD209 antigen	45.7	5.47	0.989	0.995067
SYNCRIP	Heterogeneous nuclear ribonucleoprotein Q	69.6	8.59	0.989	0.99226
HMGB1	High mobility group protein B1	24.9	5.74	0.989	0.99226
IMPA1	Inositol monophosphatase 1	30.2	5.26	0.988	0.999654
WDFY1	WD repeat and FYVE domain-containing protein 1	46.3	7.33	0.988	0.999017
PACSIN2	Protein kinase C and casein kinase substrate in neurons protein 2	55.7	5.2	0.988	0.998068
UBR1	E3 ubiquitin-protein ligase UBR1	200.1	6.01	0.988	0.995067
SLC27A1	Long-chain fatty acid transport protein 1	71.1	8.53	0.988	0.995067
[truncated: 2,248 more rows]
